# Supplementary material for: Advances in power-to-gas technologies: cost and conversion efficiency
Source: Royal Society of Chemistry journal article supplement (doi:10.1039/d3ee01208e), 2023-01-01
Supplement: d3ee01208e1.xlsx [file d3ee01208e1.xlsx]

## Sheet: Introduction
Advances in Power-to-Gas Technologies: Cost and Conversion Efficiency
		General Information
		Gunther Glenk1
		Harvard Business School, Harvard University
		Business School, University of Mannheim
		CEEPR, Massachusetts Institute of Technology
		Philip Holler
		Business School, University of Mannheim
		Stefan Reichelstein
		Business School, University of Mannheim
		Graduate School of Business, Stanford University
		Leibniz Centre for European Economic Research (ZEW)
		September 2023
		1 Corresponding author: gglenk@hbs.edu
		Outline of the file
		Gathered data on prices, conversion efficiencies and capacity data for leading three Power-to-Gas (PtG) technologies:
		• Alkaline
		• Polymer Electrolyte Membrane (PEM)
		• Solid Oxide Cell (SOC)
		Purpose of the data
		Provide the data used in producing relevant graphs and analyses (Learning Curves, Time-based forecasts)
		• Learning Curves
		• Forecasts
		• LCOH inputs

## Sheet: Graphs
Figure 1
Figure 2
Figure 3
Figure 4
Figure 5
Supplementary Figure 1
Supplementary Figure 2
Supplementary Figure 3
Supplementary Figure 4
Supplementary Figure 5

## Sheet: System Prices
Alkaline			PEM			SOC
Commission date (year)	Costs (2020$/W)	Cumulative capacity (MW)	Commission date (year)	Costs (2020$/W)	Cumulative capacity (MW)	Commission date (year)	Costs (2020$/W)	Cumulative capacity (MW)
2003	2.70603	1.60954	2003	8.30072	0.00329	2011	8.87234	0.04
2004	2.44956	1.85442	2004	9.88652	0.00564	2011	8.07864	0.04
2004	2.90454	1.85442	2004	9.33651	0.00564	2011	6.98259	0.04
2004	2.70603	1.85442	2004	8.30072	0.00564	2012	3.10647	0.05
2005	1.59812	6.92459	2005	8.30072	0.03564	2012	3.07341	0.05
2005	2.92442	6.92459	2008	6.83517	0.252456	2012	12.1343	0.05
2005	2.70603	6.92459	2010	3.09095	0.314365	2012	6.91809	0.05
2007	3.13195	7.56217	2010	3.1289	0.314365	2013	2.44167	0.09
2007	2.21309	7.56217	2013	5.44201	1.53585	2013	6.80333	0.09
2007	1.89742	7.56217	2013	1.72544	1.53585	2014	2.48845	0.128902
2008	2.038	7.91479	2014	3.07236	1.88585	2014	3.31793	0.128902
2009	3.15952	9.11979	2014	2.94006	1.88585	2014	5.77929	0.128902
2010	1.69886	9.58403	2014	2.66212	1.88585	2014	6.39609	0.128902
2011	1.68906	14.3483	2014	2.75526	1.88585	2015	5.1922	0.166902
2011	1.44721	14.3483	2014	2.14055	1.88585	2015	4.89642	0.166902
2012	1.51827	25.5043	2014	2.38776	1.88585	2015	2.41498	0.166902
2012	1.44972	25.5043	2014	3.38106	1.88585	2015	1.9046	0.166902
2013	1.32452	48.699	2014	2.43375	1.88585	2015	2.19795	0.166902
2013	1.40105	48.699	2014	2.02129	1.88585	2015	3.27915	0.166902
2013	1.76503	48.699	2014	1.76403	1.88585	2015	6.9055	0.166902
2014	1.10252	52.5513	2014	2.20504	1.88585	2015	3.39459	0.166902
2014	1.61703	52.5513	2014	4.41008	1.88585	2015	6.39378	0.166902
2014	1.76403	52.5513	2015	2.30794	8.78536	2016	2.40983	0.376902
2014	1.69053	52.5513	2015	2.41498	8.78536	2016	5.00816	0.376902
2014	1.69053	52.5513	2015	1.47169	8.78536	2016	2.38484	0.376902
2014	1.47003	52.5513	2015	2.32255	8.78536	2016	5.53364	0.376902
2015	1.69048	67.6573	2015	3.96058	8.78536	2017	5.36588	0.526902
2015	1.36713	67.6573	2015	2.41498	8.78536	2017	1.7295	0.526902
2015	1.38861	67.6573	2015	3.09117	8.78536	2017	5.1095	0.526902
2015	1.90726	67.6573	2016	1.54015	10.9131	2017	5.36588	0.526902
2015	1.86189	67.6573	2016	2.38484	10.9131	2017	5.1095	0.526902
2015	1.77098	67.6573	2016	1.2629	10.9131	2017	2.11335	0.526902
2015	1.47887	67.6573	2016	1.2629	10.9131	2017	3.57313	0.526902
2015	1.90204	67.6573	2016	2.26559	10.9131	2017	1.82646	0.526902
2015	1.57558	67.6573	2016	2.14583	10.9131	2017	2.81921	0.526902
2015	1.47582	67.6573	2017	1.4309	23.5451	2017	3.52379	0.526902
2015	1.17152	67.6573	2017	1.60976	23.5451	2017	4.07881	0.526902
2015	1.35752	67.6573	2017	1.72879	23.5451	2017	2.74792	0.526902
2015	1.77622	67.6573	2017	1.61507	23.5451	2017	5.17423	0.526902
2015	0.979901	67.6573	2017	1.48528	23.5451	2017	2.56615	0.526902
2015	1.94363	67.6573	2017	1.65898	23.5451	2018	2.82024	0.564902
2015	1.94363	67.6573	2017	1.52001	23.5451	2018	2.45238	0.564902
2015	1.47169	67.6573	2017	1.56491	23.5451	2018	1.10374	0.564902
2015	0.953934	67.6573	2017	1.4309	23.5451	2018	5.45912	0.564902
2015	1.20749	67.6573	2017	1.58571	23.5451	2018	5.08874	0.564902
2015	1.12861	67.6573	2017	2.23174	23.5451	2019	2.28505	0.913538
2015	0.997989	67.6573	2017	1.61507	23.5451	2019	4.5701	0.913538
2016	0.953934	70.1565	2017	1.82063	23.5451	2019	1.20196	0.913538
2016	1.47169	70.1565	2017	1.46825	23.5451	2019	4.27454	0.913538
2016	0.997989	70.1565	2017	2.1708	23.5451	2019	2.57068	0.913538
2016	1.54015	70.1565	2017	1.36861	23.5451	2019	2.62781	0.913538
2016	1.19242	70.1565	2018	1.79637	43.8309	2019	4.35087	0.913538
2016	1.07271	70.1565	2018	1.10357	43.8309	2019	5.5938	0.913538
2016	0.953934	70.1565	2018	1.28843	43.8309	2019	0.986471	0.913538
2016	1.4309	70.1565	2018	1.38085	43.8309	2019	3.62038	0.913538
2016	1.31166	70.1565	2018	1.58419	43.8309	2020	1.36867	1.63354
2017	0.953934	75.8876	2018	1.75056	43.8309	2020	1.84976	1.63354
2017	1.19242	75.8876	2018	1.79492	43.8309	2020	0.983745	1.63354
2017	1.16261	75.8876	2018	1.8208	43.8309	2020	2.38484	1.63354
2017	1.59251	75.8876	2018	1.8208	43.8309	2020	1.49761	1.63354
2017	1.35079	75.8876	2018	1.8208	43.8309	2020	2.49348	1.63354
2017	0.953934	75.8876	2018	1.83929	43.8309	2020	5.6168	1.63354
2017	0.982707	75.8876	2018	1.83929	43.8309
2017	1.59251	75.8876	2018	2.18603	43.8309
2017	0.953934	75.8876	2018	1.19242	43.8309
2017	1.14523	75.8876	2018	1.69827	43.8309
2017	1.29206	75.8876	2019	0.570957	64.1778
2017	1.35079	75.8876	2019	1.47573	64.1778
2017	1.1746	75.8876	2019	1.65666	64.1778
2017	1.48528	75.8876	2019	0.854909	64.1778
2017	1.25456	75.8876	2019	0.570957	64.1778
2018	0.953934	77.6725	2020	1.47003	94.0828
2018	1.1281	77.6725	2020	1.05	94.0828
2018	0.894313	77.6725	2020	1.49307	94.0828
2018	1.01854	77.6725	2020	0.888712	94.0828
2018	1.04319	77.6725	2020	1.35079	94.0828
2018	1.16642	77.6725	2020	0.783666	94.0828
2018	1.25269	77.6725	2020	0.570957	94.0828
2018	1.33895	77.6725	2020	0.855	94.0828
2018	1.35128	77.6725
2018	1.26501	77.6725
2018	1.38085	77.6725
2018	1.40057	77.6725
2018	1.41289	77.6725
2018	1.46219	77.6725
2018	1.54845	77.6725
2018	1.56078	77.6725
2018	1.56694	77.6725
2018	1.58419	77.6725
2018	1.58789	77.6725
2018	1.59405	77.6725
2018	0.991008	77.6725
2018	1.25991	77.6725
2019	0.894313	89.86
2019	0.966861	89.86
2019	1.02827	89.86
2019	0.854909	89.86
2020	0.933468	104.409
2020	0.658484	104.409
2020	0.75	104.409
2020	0.7	104.409
2020	1.25241	104.409
2020	1.30418	104.409
2020	0.783666	104.409
2020	0.855	104.409
2020	0.712819	104.409

## Sheet: Energy Consumption
Alkaline			PEM			SOC
Commission date (year)	Conversion Efficiency (kWh/kg)	Cumulative capacity (MW)	Commission date (year)	Conversion Efficiency (kWh/kg)	Cumulative capacity (MW)	Commission date (year)	Conversion Efficiency (kWh/kg)	Cumulative capacity (MW)
2003	72.3186	1.60954	2005	66.7557	0.03564	2011	52.2919	0.04
2003	74.173	1.60954	2008	68.1239	0.252456	2013	44.4072	0.09
2003	74.173	1.60954	2008	73.6789	0.252456	2013	40.8946	0.09
2003	55.1847	1.60954	2010	70.316	0.314365	2013	43.8596	0.09
2004	53.4045	1.85442	2011	74.5438	0.550204	2014	42.2786	0.128902
2004	49.7312	1.85442	2012	57.1375	0.725604	2015	42.2786	0.166902
2004	60.6209	1.85442	2012	55.6297	0.725604	2015	40.1606	0.166902
2005	56.4132	6.92459	2012	74.173	0.725604	2016	50.7926	0.376902
2005	53.4045	6.92459	2012	60.0801	0.725604	2016	37.744	0.376902
2005	66.7557	6.92459	2012	80.1068	0.725604	2017	41.7223	0.526902
2005	53.9608	6.92459	2012	72.8749	0.725604	2017	39.4971	0.526902
2005	67.8683	6.92459	2013	66.7557	1.53585	2017	46.729	0.526902
2005	53.4	6.92459	2013	83.5205	1.53585	2017	45.2489	0.526902
2006	74.173	7.33059	2013	53.8496	1.53585	2018	42.2786	0.564902
2006	66.7557	7.33059	2013	55.5556	1.53585	2018	42.2786	0.564902
2007	55.6297	7.56217	2014	59.3384	1.88585	2018	41.166	0.564902
2007	74.173	7.56217	2014	83.4446	1.88585	2019	40.0534	0.913538
2008	55.6297	7.91479	2014	56.4972	1.88585	2019	41.7223	0.913538
2008	49.5995	7.91479	2014	66.7557	1.88585	2020	40.0534	1.63354
2008	51.2821	7.91479	2014	54.6	1.88585	2020	44.6197	1.63354
2009	62.6762	9.11979	2014	54.5171	1.88585	2020	43.0987	1.63354
2009	55.6297	9.11979	2014	54.5171	1.88585
2009	49.733	9.11979	2014	54.5171	1.88585
2009	53.7634	9.11979	2015	61.8108	8.78536
2010	59.3384	9.58403	2015	57.548	8.78536
2010	55.6297	9.58403	2015	55.6297	8.78536
2011	55.6297	14.3483	2015	55.6297	8.78536
2011	60.0801	14.3483	2015	64.9013	8.78536
2011	50.0043	14.3483	2015	55.6297	8.78536
2011	62.5	14.3483	2015	52.381	8.78536
2012	51.9211	25.5043	2015	52.9101	8.78536
2012	58.4112	25.5043	2015	66.7557	8.78536
2012	72.6107	25.5043	2016	66.7557	10.9131
2012	60.0801	25.5043	2016	69.5372	10.9131
2012	50.4682	25.5043	2017	55.6297	23.5451
2012	64.3636	25.5043	2017	55.0734	23.5451
2012	49.7886	25.5043	2017	63	23.5451
2012	61.749	25.5043	2017	60.0801	23.5451
2012	48.3283	25.5043	2017	62	23.5451
2012	58.9675	25.5043	2017	52	23.5451
2012	58.1331	25.5043	2018	55.6297	43.8309
2012	67.9239	25.5043	2018	59.3384	43.8309
2012	49.7886	25.5043	2018	58.0484	43.8309
2013	51.3505	48.699	2018	55.6297	43.8309
2013	61.8108	48.699	2018	55.6297	43.8309
2013	58.4112	48.699	2018	54.5171	43.8309
2013	71.9858	48.699	2018	55.6297	43.8309
2013	50.5725	48.699	2018	57.8549	43.8309
2013	50.5563	48.699	2018	58.4112	43.8309
2013	50.0668	48.699	2018	61.1927	43.8309
2013	51.7356	48.699	2018	55.6297	43.8309
2013	48.523	48.699	2018	51.2267	43.8309
2014	61.8108	52.5513	2018	51.2267	43.8309
2014	55.6297	52.5513	2018	64.5305	43.8309
2014	50.8906	52.5513	2018	66.7557	43.8309
2014	53.7634	52.5513	2018	54.5171	43.8309
2014	52.8482	52.5513	2018	61.1927	43.8309
2014	63.9742	52.5513	2018	54	43.8309
2015	52.9807	67.6573	2019	55.6297	64.1778
2015	64.4378	67.6573	2019	55.6297	64.1778
2015	49.5105	67.6573	2019	64.9013	64.1778
2015	58.4112	67.6573	2019	64.9013	64.1778
2015	64.4378	67.6573	2019	67.8411	64.1778
2015	50.586	67.6573	2019	53.4045	64.1778
2015	61.1621	67.6573	2019	69.1817	64.1778
2015	52.9101	67.6573	2019	69.1817	64.1778
2015	50.0668	67.6573	2019	61.8603	64.1778
2015	58.9675	67.6573	2019	55.5556	64.1778
2015	54.5171	67.6573	2020	60.1402	94.0828
2015	55.6297	67.6573	2020	55.6297	94.0828
2015	51.0681	67.6573	2020	61.1927	94.0828
2015	50.6231	67.6573	2020	54.4204	94.0828
2015	51.0681	67.6573	2020	55.6297	94.0828
2015	61.1927	67.6573	2020	52.9807	94.0828
2015	50.0668	67.6573	2020	55.6297	94.0828
2015	52.2919	67.6573	2020	52.7826	94.0828
2015	52.2919	67.6573	2020	66.5	94.0828
2015	49.5105	67.6573	2020	61.1111	94.0828
2015	54.5171	67.6573
2015	55.6297	67.6573
2016	55.6297	70.1565
2016	61.8108	70.1565
2016	56.7423	70.1565
2017	63.1903	75.8876
2017	55.6297	75.8876
2017	50.4376	75.8876
2017	50.0668	75.8876
2017	55.0734	75.8876
2017	58.9675	75.8876
2017	58	75.8876
2017	61.749	75.8876
2017	47.2069	75.8876
2017	52	75.8876
2017	52.9101	75.8876
2018	51.9211	77.6725
2018	50.0668	77.6725
2018	62.3727	77.6725
2018	57.8549	77.6725
2018	52.2919	77.6725
2018	49.7886	77.6725
2018	52.2919	77.6725
2018	46.729	77.6725
2018	49.7886	77.6725
2018	51.1794	77.6725
2018	46.6919	77.6725
2018	49.5105	77.6725
2018	62.6998	77.6725
2018	48.9542	77.6725
2018	47.8416	77.6725
2018	52.2919	77.6725
2018	58.9675	77.6725
2018	62.3053	77.6725
2018	53.4045	77.6725
2018	46.729	77.6725
2018	60.0801	77.6725
2018	57.8549	77.6725
2018	55.6297	77.6725
2018	58	77.6725
2019	55.6297	89.86
2019	46.3581	89.86
2019	55.6297	89.86
2019	55.6297	89.86
2019	53.4045	89.86
2019	55.5556	89.86
2020	46.3581	104.409
2020	46.3581	104.409
2020	52.0833	104.409
2020	55.6297	104.409
2020	59.3964	104.409
2020	50.2646	104.409

## Sheet: Projected Prices
	Alkaline					PEM					SOC
Year	Past Growth	Policy Target	Industry Target	Policy Target (less PEM)	Industry Target (less PEM)	Past Growth	Policy Target	Industry Target	Policy Target (less PEM)	Industry Target (less PEM)	Past Growth	Policy Target	Industry Target	Policy Target (less PEM)	Industry Target (less PEM)
2021	1051.35	1018.53	999.986	990.078	969.099	1106.19	1078.61	1062.9	1086.7	1072.87	2040.14	1970.16	1930.59	1890.76	1845.79
2022	965.496	906.249	873.541	856.314	820.409	992.907	944.011	916.704	958.22	933.99	1829.9	1706.5	1638.64	1571.73	1497.85
2023	886.657	805.709	762.609	740.215	694.238	891.222	826.207	790.618	844.93	813.086	1641.32	1478.13	1390.84	1306.53	1215.51
2024	814.256	717.061	666.328	640.343	587.825	799.951	723.104	681.874	745.035	707.833	1472.17	1280.33	1180.52	1086.08	986.382
2025	747.766	637.512	581.778	553.609	497.514	718.027	632.866	588.087	656.949	616.204	1320.46	1108.99	1002	902.823	800.447
2026	686.706	567.501	508.399	478.963	421.27	644.493	553.89	507.201	579.279	536.438	1184.38	960.581	850.477	750.489	649.562
2027	630.632	505.102	444.213	414.329	356.673	578.49	484.769	437.439	510.79	466.996	1062.33	832.033	721.867	623.858	527.118
2028	579.137	449.507	388.092	358.385	301.963	519.246	424.275	377.272	450.4	406.544	952.849	720.688	612.706	518.594	427.756
2029	531.847	399.993	339.039	309.979	255.636	466.069	371.329	325.382	397.15	353.918	854.654	624.243	520.052	431.091	347.123
2030	488.418	355.927	296.181	268.107	216.414	418.339	324.991	280.628	350.196	308.103	766.579	540.705	441.409	358.353	281.69

## Sheet: Projected Energy Consumption
	Alkaline					PEM					SOC
Year	Past Growth	Policy Target	Industry Target	Policy Target (less PEM)	Industry Target (less PEM)	Past Growth	Policy Target	Industry Target	Policy Target (less PEM)	Industry Target (less PEM)	Past Growth	Policy Target	Industry Target	Policy Target (less PEM)	Industry Target (less PEM)
2021	53.5351	53.361	53.2603	53.2058	53.0889	56.6339	56.4569	56.1903	56.5092	56.4195	41.054	40.9303	40.8585	40.7849	40.7001
2022	53.0685	52.7243	52.5256	52.4182	52.188	55.8801	55.5312	55.1306	55.6342	55.4577	40.6697	40.425	40.2834	40.1384	39.9717
2023	52.6061	52.0911	51.7977	51.6393	51.3002	55.1363	54.6207	54.0909	54.7727	54.5123	40.289	39.9259	39.7163	39.5021	39.2562
2024	52.1476	51.471	51.0843	50.876	50.4306	54.4023	53.7251	53.0709	53.9246	53.5831	39.9119	39.433	39.1572	38.8759	38.5536
2025	51.6932	50.8528	50.377	50.1208	49.5736	53.6782	52.8442	52.07	53.0896	52.6696	39.5384	38.9461	38.606	38.2596	37.8635
2026	51.2427	50.2486	49.684	49.3804	48.7335	52.9637	51.9778	51.088	52.2675	51.7718	39.1683	38.4653	38.0625	37.6531	37.1858
2027	50.7962	49.6508	48.9997	48.6503	47.907	52.2587	51.1255	50.1246	51.4581	50.8892	38.8016	37.9904	37.5267	37.0562	36.5202
2028	50.3535	49.0594	48.3244	47.9306	47.0943	51.563	50.2873	49.1793	50.6613	50.0217	38.4385	37.5214	36.9985	36.4688	35.8666
2029	49.9147	48.4746	47.6581	47.2213	46.2953	50.8767	49.4627	48.2519	49.8769	49.169	38.0787	37.0582	36.4777	35.8907	35.2246
2030	49.4797	47.8967	47.0009	46.5224	45.5097	50.1995	48.6517	47.3419	49.1046	48.3308	37.7222	36.6007	35.9642	35.3217	34.5942

## Sheet: Cumulative Installed Capacity
Alkaline		PEM		SOC			Forecast	Alkaline					PEM					SOC
Commission date (year)	Cumulative capacity (MW)	Commission date (year)	Cumulative capacity (MW)	Commission date (year)	Cumulative capacity (MW)		Year	Past Growth	Policy Target	Industry Target	Policy Target (less PEM)	Industry Target (less PEM)	Past Growth	Policy Target	Industry Target	Policy Target (less PEM)	Industry Target (less PEM)	Past Growth	Policy Target	Industry Target	Policy Target (less PEM)	Industry Target (less PEM)
2000	0.05	2004	0.00564	2011	0.04		2030	3690	13772	29682	45002	110114	26898	100861	217458	68221	133362	100	376	812	1787	4446
2001	0.055	2005	0.03564	2012	0.05
2002	0.0839447	2006	0.03564	2013	0.09
2003	1.60954	2007	0.171762	2014	0.128902
2004	1.85442	2008	0.252456	2015	0.166902
2005	6.92459	2009	0.252456	2016	0.376902
2006	7.33059	2010	0.314365	2017	0.526902
2007	7.56217	2011	0.550204	2018	0.564902
2008	7.91479	2012	0.725604	2019	0.913538
2009	9.11979	2013	1.53585	2020	1.63354
2010	9.58403	2014	1.88585
2011	14.3483	2015	8.78536
2012	25.5043	2016	10.9131
2013	48.699	2017	23.5451
2014	52.5513	2018	43.8309
2015	67.6573	2019	64.1778
2016	70.1565	2020	94.0828
2017	75.8876
2018	77.6725
2019	89.86
2020	104.409

## Sheet: Electricity Prices
Month	Day of Month	Hour	Electricity Price [USD/kWh]
1	1	0	0.019913
1	1	1	0.020128
1	1	2	0.018668
1	1	3	0.018138
1	1	4	0.018314
1	1	5	0.01915
1	1	6	0.020488
1	1	7	0.02342
1	1	8	0.024556
1	1	9	0.028506
1	1	10	0.029578
1	1	11	0.028618
1	1	12	0.025098
1	1	13	0.023606
1	1	14	0.022504
1	1	15	0.022256
1	1	16	0.021728
1	1	17	0.022716
1	1	18	0.033592
1	1	19	0.035862
1	1	20	0.031164
1	1	21	0.028924
1	1	22	0.025626
1	1	23	0.024224
1	2	0	0.022806
1	2	1	0.021334
1	2	2	0.019406
1	2	3	0.019306
1	2	4	0.019748
1	2	5	0.023242
1	2	6	0.025538
1	2	7	0.051568
1	2	8	0.057094
1	2	9	0.043376
1	2	10	0.040606
1	2	11	0.034514
1	2	12	0.030452
1	2	13	0.027926
1	2	14	0.026678
1	2	15	0.02635
1	2	16	0.025604
1	2	17	0.027896
1	2	18	0.049674
1	2	19	0.050838
1	2	20	0.036992
1	2	21	0.034744
1	2	22	0.02972
1	2	23	0.02689
1	3	0	0.023159
1	3	1	0.020446
1	3	2	0.018842
1	3	3	0.01884
1	3	4	0.019592
1	3	5	0.023122
1	3	6	0.026706
1	3	7	0.045584
1	3	8	0.040864
1	3	9	0.033806
1	3	10	0.032974
1	3	11	0.030416
1	3	12	0.02814
1	3	13	0.026586
1	3	14	0.025538
1	3	15	0.02471
1	3	16	0.024574
1	3	17	0.026104
1	3	18	0.036022
1	3	19	0.038442
1	3	20	0.033886
1	3	21	0.033126
1	3	22	0.030966
1	3	23	0.02822
1	4	0	0.026176
1	4	1	0.024448
1	4	2	0.02408
1	4	3	0.023874
1	4	4	0.02445
1	4	5	0.025326
1	4	6	0.03012
1	4	7	0.052164
1	4	8	0.042836
1	4	9	0.03479
1	4	10	0.034252
1	4	11	0.030058
1	4	12	0.027196
1	4	13	0.025852
1	4	14	0.02414
1	4	15	0.0232
1	4	16	0.02282
1	4	17	0.024352
1	4	18	0.03254
1	4	19	0.033536
1	4	20	0.029566
1	4	21	0.028514
1	4	22	0.026528
1	4	23	0.026276
1	5	0	0.025089
1	5	1	0.02123
1	5	2	0.01937
1	5	3	0.019684
1	5	4	0.020278
1	5	5	0.021892
1	5	6	0.024588
1	5	7	0.035228
1	5	8	0.031842
1	5	9	0.027542
1	5	10	0.025366
1	5	11	0.024272
1	5	12	0.022798
1	5	13	0.022262
1	5	14	0.021376
1	5	15	0.020734
1	5	16	0.020174
1	5	17	0.020904
1	5	18	0.028608
1	5	19	0.028082
1	5	20	0.024126
1	5	21	0.023052
1	5	22	0.021564
1	5	23	0.021156
1	6	0	0.02068
1	6	1	0.017182
1	6	2	0.016414
1	6	3	0.016382
1	6	4	0.016868
1	6	5	0.018536
1	6	6	0.02075
1	6	7	0.028076
1	6	8	0.027976
1	6	9	0.025428
1	6	10	0.02457
1	6	11	0.023446
1	6	12	0.02166
1	6	13	0.020382
1	6	14	0.019288
1	6	15	0.018466
1	6	16	0.018008
1	6	17	0.01856
1	6	18	0.028088
1	6	19	0.026744
1	6	20	0.023622
1	6	21	0.022012
1	6	22	0.021076
1	6	23	0.018598
1	7	0	0.01698
1	7	1	0.016462
1	7	2	0.014304
1	7	3	0.013916
1	7	4	0.01461
1	7	5	0.016162
1	7	6	0.020108
1	7	7	0.026766
1	7	8	0.026942
1	7	9	0.035134
1	7	10	0.030858
1	7	11	0.024308
1	7	12	0.021598
1	7	13	0.020142
1	7	14	0.019318
1	7	15	0.018614
1	7	16	0.018638
1	7	17	0.019432
1	7	18	0.028324
1	7	19	0.028532
1	7	20	0.023706
1	7	21	0.021612
1	7	22	0.020388
1	7	23	0.018598
1	8	0	0.017084
1	8	1	0.01639
1	8	2	0.015734
1	8	3	0.015674
1	8	4	0.015908
1	8	5	0.016846
1	8	6	0.018804
1	8	7	0.024358
1	8	8	0.027162
1	8	9	0.0241
1	8	10	0.023658
1	8	11	0.021916
1	8	12	0.019628
1	8	13	0.01876
1	8	14	0.018218
1	8	15	0.017714
1	8	16	0.017586
1	8	17	0.018536
1	8	18	0.028698
1	8	19	0.027124
1	8	20	0.022836
1	8	21	0.02152
1	8	22	0.020688
1	8	23	0.018172
1	9	0	0.017487
1	9	1	0.015626
1	9	2	0.014952
1	9	3	0.014804
1	9	4	0.014864
1	9	5	0.015612
1	9	6	0.01704
1	9	7	0.026152
1	9	8	0.026288
1	9	9	0.022104
1	9	10	0.02209
1	9	11	0.020886
1	9	12	0.020698
1	9	13	0.019584
1	9	14	0.019286
1	9	15	0.018612
1	9	16	0.0184
1	9	17	0.019148
1	9	18	0.026042
1	9	19	0.024014
1	9	20	0.020998
1	9	21	0.019794
1	9	22	0.018616
1	9	23	0.016538
1	10	0	0.014496
1	10	1	0.012726
1	10	2	0.01198
1	10	3	0.012312
1	10	4	0.012908
1	10	5	0.01424
1	10	6	0.01705
1	10	7	0.025752
1	10	8	0.025186
1	10	9	0.02297
1	10	10	0.023962
1	10	11	0.022234
1	10	12	0.020664
1	10	13	0.020284
1	10	14	0.01992
1	10	15	0.018664
1	10	16	0.01879
1	10	17	0.019572
1	10	18	0.029518
1	10	19	0.024874
1	10	20	0.020778
1	10	21	0.01967
1	10	22	0.019008
1	10	23	0.016792
1	11	0	0.015037
1	11	1	0.0113
1	11	2	0.010504
1	11	3	0.010402
1	11	4	0.010678
1	11	5	0.01263
1	11	6	0.016112
1	11	7	0.026982
1	11	8	0.023964
1	11	9	0.020348
1	11	10	0.020234
1	11	11	0.020406
1	11	12	0.019868
1	11	13	0.018774
1	11	14	0.018522
1	11	15	0.01801
1	11	16	0.018426
1	11	17	0.018976
1	11	18	0.029012
1	11	19	0.030702
1	11	20	0.024646
1	11	21	0.022166
1	11	22	0.020218
1	11	23	0.018868
1	12	0	0.016958
1	12	1	0.01503
1	12	2	0.014582
1	12	3	0.014558
1	12	4	0.015498
1	12	5	0.017714
1	12	6	0.020552
1	12	7	0.030882
1	12	8	0.02787
1	12	9	0.024384
1	12	10	0.02331
1	12	11	0.021814
1	12	12	0.020838
1	12	13	0.0198
1	12	14	0.020182
1	12	15	0.019556
1	12	16	0.01941
1	12	17	0.020368
1	12	18	0.030468
1	12	19	0.031116
1	12	20	0.02625
1	12	21	0.02366
1	12	22	0.022646
1	12	23	0.020948
1	13	0	0.019713
1	13	1	0.01974
1	13	2	0.018824
1	13	3	0.018628
1	13	4	0.018314
1	13	5	0.019764
1	13	6	0.022652
1	13	7	0.030178
1	13	8	0.029816
1	13	9	0.030846
1	13	10	0.028738
1	13	11	0.026198
1	13	12	0.0238
1	13	13	0.022614
1	13	14	0.021442
1	13	15	0.020686
1	13	16	0.019984
1	13	17	0.021072
1	13	18	0.029706
1	13	19	0.033664
1	13	20	0.028248
1	13	21	0.024972
1	13	22	0.02396
1	13	23	0.022018
1	14	0	0.02063
1	14	1	0.019382
1	14	2	0.017868
1	14	3	0.017502
1	14	4	0.01836
1	14	5	0.019588
1	14	6	0.022668
1	14	7	0.034634
1	14	8	0.03179
1	14	9	0.02813
1	14	10	0.026636
1	14	11	0.025714
1	14	12	0.025282
1	14	13	0.022808
1	14	14	0.021526
1	14	15	0.020766
1	14	16	0.019884
1	14	17	0.02095
1	14	18	0.028708
1	14	19	0.0287
1	14	20	0.02429
1	14	21	0.022632
1	14	22	0.020552
1	14	23	0.019616
1	15	0	0.018566
1	15	1	0.016628
1	15	2	0.0155
1	15	3	0.015178
1	15	4	0.015616
1	15	5	0.01744
1	15	6	0.019656
1	15	7	0.02817
1	15	8	0.026136
1	15	9	0.02425
1	15	10	0.02506
1	15	11	0.024878
1	15	12	0.024024
1	15	13	0.023076
1	15	14	0.021778
1	15	15	0.021512
1	15	16	0.021198
1	15	17	0.021546
1	15	18	0.029392
1	15	19	0.03138
1	15	20	0.023176
1	15	21	0.02179
1	15	22	0.020284
1	15	23	0.019132
1	16	0	0.018071
1	16	1	0.018034
1	16	2	0.01707
1	16	3	0.016662
1	16	4	0.017208
1	16	5	0.018912
1	16	6	0.02209
1	16	7	0.031502
1	16	8	0.032596
1	16	9	0.029574
1	16	10	0.0294
1	16	11	0.027264
1	16	12	0.025806
1	16	13	0.025436
1	16	14	0.025106
1	16	15	0.024818
1	16	16	0.025716
1	16	17	0.028818
1	16	18	0.051982
1	16	19	0.063594
1	16	20	0.044642
1	16	21	0.03543
1	16	22	0.032648
1	16	23	0.027576
1	17	0	0.025115
1	17	1	0.028088
1	17	2	0.026874
1	17	3	0.027192
1	17	4	0.028836
1	17	5	0.037704
1	17	6	0.075356
1	17	7	0.334316
1	17	8	0.35222
1	17	9	0.125902
1	17	10	0.041332
1	17	11	0.039084
1	17	12	0.033622
1	17	13	0.030606
1	17	14	0.028734
1	17	15	0.026548
1	17	16	0.026146
1	17	17	0.02749
1	17	18	0.037964
1	17	19	0.043282
1	17	20	0.035446
1	17	21	0.032198
1	17	22	0.029558
1	17	23	0.02711
1	18	0	0.025171
1	18	1	0.022474
1	18	2	0.022266
1	18	3	0.022592
1	18	4	0.023192
1	18	5	0.024626
1	18	6	0.037192
1	18	7	0.077354
1	18	8	0.075282
1	18	9	0.048014
1	18	10	0.037156
1	18	11	0.032984
1	18	12	0.028028
1	18	13	0.02604
1	18	14	0.024086
1	18	15	0.023126
1	18	16	0.022766
1	18	17	0.023206
1	18	18	0.031258
1	18	19	0.03422
1	18	20	0.027036
1	18	21	0.024194
1	18	22	0.022324
1	18	23	0.020514
1	19	0	0.018779
1	19	1	0.01571
1	19	2	0.014416
1	19	3	0.014706
1	19	4	0.015234
1	19	5	0.016686
1	19	6	0.019474
1	19	7	0.029896
1	19	8	0.029404
1	19	9	0.026718
1	19	10	0.024206
1	19	11	0.021686
1	19	12	0.020636
1	19	13	0.019852
1	19	14	0.019332
1	19	15	0.018718
1	19	16	0.018624
1	19	17	0.019618
1	19	18	0.030152
1	19	19	0.03563
1	19	20	0.028474
1	19	21	0.02591
1	19	22	0.023368
1	19	23	0.021068
1	20	0	0.01801
1	20	1	0.016532
1	20	2	0.0155
1	20	3	0.014946
1	20	4	0.015182
1	20	5	0.017034
1	20	6	0.020398
1	20	7	0.032286
1	20	8	0.0318
1	20	9	0.031164
1	20	10	0.027724
1	20	11	0.024586
1	20	12	0.023682
1	20	13	0.021678
1	20	14	0.020722
1	20	15	0.020082
1	20	16	0.019398
1	20	17	0.019422
1	20	18	0.026436
1	20	19	0.027672
1	20	20	0.022502
1	20	21	0.02079
1	20	22	0.018992
1	20	23	0.016642
1	21	0	0.014941
1	21	1	0.014102
1	21	2	0.012942
1	21	3	0.011896
1	21	4	0.01238
1	21	5	0.013746
1	21	6	0.016274
1	21	7	0.028358
1	21	8	0.023808
1	21	9	0.02036
1	21	10	0.019542
1	21	11	0.019458
1	21	12	0.018558
1	21	13	0.017306
1	21	14	0.017436
1	21	15	0.016798
1	21	16	0.016644
1	21	17	0.017432
1	21	18	0.022564
1	21	19	0.024284
1	21	20	0.020824
1	21	21	0.019302
1	21	22	0.018152
1	21	23	0.01581
1	22	0	0.015077
1	22	1	0.012002
1	22	2	0.010764
1	22	3	0.010356
1	22	4	0.011214
1	22	5	0.012496
1	22	6	0.014786
1	22	7	0.026232
1	22	8	0.024654
1	22	9	0.02263
1	22	10	0.022694
1	22	11	0.021232
1	22	12	0.02001
1	22	13	0.01939
1	22	14	0.019022
1	22	15	0.019
1	22	16	0.019
1	22	17	0.020014
1	22	18	0.029492
1	22	19	0.035222
1	22	20	0.026968
1	22	21	0.025132
1	22	22	0.02298
1	22	23	0.020682
1	23	0	0.019862
1	23	1	0.018434
1	23	2	0.01793
1	23	3	0.01799
1	23	4	0.01842
1	23	5	0.020024
1	23	6	0.021906
1	23	7	0.035854
1	23	8	0.03421
1	23	9	0.029386
1	23	10	0.025492
1	23	11	0.023558
1	23	12	0.021656
1	23	13	0.021292
1	23	14	0.019732
1	23	15	0.019338
1	23	16	0.019116
1	23	17	0.019646
1	23	18	0.028484
1	23	19	0.034214
1	23	20	0.026844
1	23	21	0.024732
1	23	22	0.022344
1	23	23	0.019732
1	24	0	0.01816
1	24	1	0.015284
1	24	2	0.014594
1	24	3	0.014608
1	24	4	0.014818
1	24	5	0.016244
1	24	6	0.021834
1	24	7	0.043976
1	24	8	0.036076
1	24	9	0.026298
1	24	10	0.023606
1	24	11	0.021286
1	24	12	0.01997
1	24	13	0.019064
1	24	14	0.018592
1	24	15	0.01816
1	24	16	0.017952
1	24	17	0.01875
1	24	18	0.026644
1	24	19	0.027248
1	24	20	0.021674
1	24	21	0.020624
1	24	22	0.020224
1	24	23	0.018342
1	25	0	0.017033
1	25	1	0.015554
1	25	2	0.01508
1	25	3	0.015982
1	25	4	0.017476
1	25	5	0.018096
1	25	6	0.020578
1	25	7	0.035548
1	25	8	0.031282
1	25	9	0.026044
1	25	10	0.02442
1	25	11	0.022138
1	25	12	0.021016
1	25	13	0.01987
1	25	14	0.019194
1	25	15	0.018508
1	25	16	0.018354
1	25	17	0.019006
1	25	18	0.02989
1	25	19	0.033482
1	25	20	0.025234
1	25	21	0.023144
1	25	22	0.021536
1	25	23	0.019774
1	26	0	0.018593
1	26	1	0.016996
1	26	2	0.01626
1	26	3	0.01622
1	26	4	0.016578
1	26	5	0.017678
1	26	6	0.020108
1	26	7	0.028592
1	26	8	0.027404
1	26	9	0.026188
1	26	10	0.025872
1	26	11	0.02361
1	26	12	0.021814
1	26	13	0.020864
1	26	14	0.019772
1	26	15	0.019408
1	26	16	0.01896
1	26	17	0.019924
1	26	18	0.029128
1	26	19	0.034804
1	26	20	0.028186
1	26	21	0.025328
1	26	22	0.022872
1	26	23	0.021118
1	27	0	0.019969
1	27	1	0.021336
1	27	2	0.01961
1	27	3	0.018428
1	27	4	0.01831
1	27	5	0.018884
1	27	6	0.021226
1	27	7	0.035576
1	27	8	0.02992
1	27	9	0.028236
1	27	10	0.028282
1	27	11	0.025396
1	27	12	0.023942
1	27	13	0.02157
1	27	14	0.020654
1	27	15	0.019588
1	27	16	0.019224
1	27	17	0.01925
1	27	18	0.02522
1	27	19	0.031388
1	27	20	0.023872
1	27	21	0.022364
1	27	22	0.021066
1	27	23	0.02099
1	28	0	0.019276
1	28	1	0.017136
1	28	2	0.015482
1	28	3	0.014826
1	28	4	0.015228
1	28	5	0.016654
1	28	6	0.020772
1	28	7	0.031792
1	28	8	0.028698
1	28	9	0.025736
1	28	10	0.025356
1	28	11	0.02344
1	28	12	0.020794
1	28	13	0.018464
1	28	14	0.017678
1	28	15	0.017046
1	28	16	0.017206
1	28	17	0.017864
1	28	18	0.02408
1	28	19	0.031564
1	28	20	0.025454
1	28	21	0.023728
1	28	22	0.023714
1	28	23	0.021934
1	29	0	0.02113
1	29	1	0.019574
1	29	2	0.01836
1	29	3	0.01825
1	29	4	0.019562
1	29	5	0.021484
1	29	6	0.023962
1	29	7	0.045688
1	29	8	0.03848
1	29	9	0.030584
1	29	10	0.027914
1	29	11	0.025212
1	29	12	0.022808
1	29	13	0.021014
1	29	14	0.019524
1	29	15	0.018852
1	29	16	0.018652
1	29	17	0.019576
1	29	18	0.027142
1	29	19	0.035968
1	29	20	0.025164
1	29	21	0.022948
1	29	22	0.021792
1	29	23	0.020414
1	30	0	0.019201
1	30	1	0.017146
1	30	2	0.016816
1	30	3	0.016696
1	30	4	0.01739
1	30	5	0.018426
1	30	6	0.021578
1	30	7	0.038106
1	30	8	0.035174
1	30	9	0.027804
1	30	10	0.025676
1	30	11	0.023578
1	30	12	0.021524
1	30	13	0.019928
1	30	14	0.018932
1	30	15	0.01802
1	30	16	0.017824
1	30	17	0.01842
1	30	18	0.02445
1	30	19	0.029296
1	30	20	0.022576
1	30	21	0.02086
1	30	22	0.019708
1	30	23	0.016444
1	31	0	0.015338
1	31	1	0.013886
1	31	2	0.01333
1	31	3	0.013308
1	31	4	0.013362
1	31	5	0.01508
1	31	6	0.017478
1	31	7	0.029574
1	31	8	0.025804
1	31	9	0.021376
1	31	10	0.020316
1	31	11	0.019566
1	31	12	0.018864
1	31	13	0.019148
1	31	14	0.019322
1	31	15	0.01904
1	31	16	0.019076
1	31	17	0.020172
1	31	18	0.027918
1	31	19	0.03144
1	31	20	0.023298
1	31	21	0.022308
1	31	22	0.020068
1	31	23	0.018374
2	1	0	0.016212
2	1	1	0.013888
2	1	2	0.012698
2	1	3	0.012618
2	1	4	0.014688
2	1	5	0.015462
2	1	6	0.018666
2	1	7	0.028534
2	1	8	0.023616
2	1	9	0.023272
2	1	10	0.023878
2	1	11	0.022476
2	1	12	0.021146
2	1	13	0.020324
2	1	14	0.020344
2	1	15	0.020392
2	1	16	0.019716
2	1	17	0.01983
2	1	18	0.025588
2	1	19	0.02957
2	1	20	0.021388
2	1	21	0.020152
2	1	22	0.019034
2	1	23	0.017124
2	2	0	0.015314
2	2	1	0.0142
2	2	2	0.013542
2	2	3	0.013306
2	2	4	0.01352
2	2	5	0.015248
2	2	6	0.016698
2	2	7	0.024496
2	2	8	0.022716
2	2	9	0.022384
2	2	10	0.022306
2	2	11	0.021928
2	2	12	0.020564
2	2	13	0.019102
2	2	14	0.018476
2	2	15	0.017942
2	2	16	0.01805
2	2	17	0.01837
2	2	18	0.023318
2	2	19	0.030078
2	2	20	0.020872
2	2	21	0.019116
2	2	22	0.018228
2	2	23	0.0171
2	3	0	0.015881
2	3	1	0.013148
2	3	2	0.011804
2	3	3	0.011324
2	3	4	0.011638
2	3	5	0.012284
2	3	6	0.015614
2	3	7	0.025296
2	3	8	0.021518
2	3	9	0.021708
2	3	10	0.02074
2	3	11	0.018798
2	3	12	0.017306
2	3	13	0.017002
2	3	14	0.017102
2	3	15	0.016878
2	3	16	0.01659
2	3	17	0.01717
2	3	18	0.023054
2	3	19	0.029616
2	3	20	0.020396
2	3	21	0.018998
2	3	22	0.018362
2	3	23	0.016526
2	4	0	0.015876
2	4	1	0.013284
2	4	2	0.01271
2	4	3	0.012668
2	4	4	0.013318
2	4	5	0.014902
2	4	6	0.018326
2	4	7	0.026268
2	4	8	0.023652
2	4	9	0.022878
2	4	10	0.024266
2	4	11	0.022486
2	4	12	0.02134
2	4	13	0.020258
2	4	14	0.020204
2	4	15	0.018998
2	4	16	0.018354
2	4	17	0.018176
2	4	18	0.02306
2	4	19	0.027744
2	4	20	0.020498
2	4	21	0.019478
2	4	22	0.018194
2	4	23	0.016494
2	5	0	0.015679
2	5	1	0.013926
2	5	2	0.012148
2	5	3	0.012038
2	5	4	0.012692
2	5	5	0.014854
2	5	6	0.017636
2	5	7	0.027102
2	5	8	0.024062
2	5	9	0.020394
2	5	10	0.020308
2	5	11	0.019064
2	5	12	0.01914
2	5	13	0.019172
2	5	14	0.01836
2	5	15	0.017898
2	5	16	0.018098
2	5	17	0.018428
2	5	18	0.025294
2	5	19	0.036026
2	5	20	0.023972
2	5	21	0.021102
2	5	22	0.019248
2	5	23	0.017378
2	6	0	0.013748
2	6	1	0.012738
2	6	2	0.011862
2	6	3	0.011628
2	6	4	0.012288
2	6	5	0.013468
2	6	6	0.01711
2	6	7	0.031272
2	6	8	0.02834
2	6	9	0.025248
2	6	10	0.024204
2	6	11	0.021982
2	6	12	0.020454
2	6	13	0.01936
2	6	14	0.018618
2	6	15	0.0179
2	6	16	0.017682
2	6	17	0.018474
2	6	18	0.0228
2	6	19	0.035508
2	6	20	0.0225
2	6	21	0.019728
2	6	22	0.01828
2	6	23	0.01633
2	7	0	0.01351
2	7	1	0.011966
2	7	2	0.010678
2	7	3	0.010018
2	7	4	0.010556
2	7	5	0.011628
2	7	6	0.016416
2	7	7	0.028468
2	7	8	0.025824
2	7	9	0.023896
2	7	10	0.022714
2	7	11	0.020364
2	7	12	0.019934
2	7	13	0.019612
2	7	14	0.019992
2	7	15	0.019912
2	7	16	0.020328
2	7	17	0.019788
2	7	18	0.02345
2	7	19	0.032128
2	7	20	0.024854
2	7	21	0.02133
2	7	22	0.019548
2	7	23	0.018336
2	8	0	0.016489
2	8	1	0.014758
2	8	2	0.013978
2	8	3	0.013972
2	8	4	0.014828
2	8	5	0.016906
2	8	6	0.02035
2	8	7	0.03851
2	8	8	0.034946
2	8	9	0.029372
2	8	10	0.025976
2	8	11	0.022484
2	8	12	0.021652
2	8	13	0.020486
2	8	14	0.0205
2	8	15	0.020796
2	8	16	0.022014
2	8	17	0.02073
2	8	18	0.02304
2	8	19	0.031384
2	8	20	0.022676
2	8	21	0.020956
2	8	22	0.019082
2	8	23	0.017262
2	9	0	0.017052
2	9	1	0.015148
2	9	2	0.014614
2	9	3	0.01437
2	9	4	0.014606
2	9	5	0.015398
2	9	6	0.017866
2	9	7	0.028274
2	9	8	0.02483
2	9	9	0.02485
2	9	10	0.025052
2	9	11	0.023774
2	9	12	0.021022
2	9	13	0.019854
2	9	14	0.018778
2	9	15	0.018554
2	9	16	0.018194
2	9	17	0.01845
2	9	18	0.02209
2	9	19	0.026752
2	9	20	0.020222
2	9	21	0.01868
2	9	22	0.017076
2	9	23	0.015712
2	10	0	0.014774
2	10	1	0.0123
2	10	2	0.012544
2	10	3	0.012362
2	10	4	0.013056
2	10	5	0.013896
2	10	6	0.015906
2	10	7	0.022058
2	10	8	0.020754
2	10	9	0.02178
2	10	10	0.023262
2	10	11	0.022726
2	10	12	0.021188
2	10	13	0.020786
2	10	14	0.020148
2	10	15	0.01995
2	10	16	0.019628
2	10	17	0.01944
2	10	18	0.02403
2	10	19	0.033944
2	10	20	0.021276
2	10	21	0.019822
2	10	22	0.01791
2	10	23	0.01513
2	11	0	0.013724
2	11	1	0.013052
2	11	2	0.01148
2	11	3	0.011296
2	11	4	0.011712
2	11	5	0.012696
2	11	6	0.01583
2	11	7	0.025726
2	11	8	0.02103
2	11	9	0.022108
2	11	10	0.021512
2	11	11	0.020718
2	11	12	0.020444
2	11	13	0.02013
2	11	14	0.021122
2	11	15	0.020406
2	11	16	0.020704
2	11	17	0.02019
2	11	18	0.025286
2	11	19	0.038116
2	11	20	0.026254
2	11	21	0.024094
2	11	22	0.020646
2	11	23	0.019418
2	12	0	0.016757
2	12	1	0.017374
2	12	2	0.016552
2	12	3	0.01531
2	12	4	0.015494
2	12	5	0.016486
2	12	6	0.018628
2	12	7	0.037976
2	12	8	0.030178
2	12	9	0.02454
2	12	10	0.023484
2	12	11	0.022342
2	12	12	0.02074
2	12	13	0.019806
2	12	14	0.019134
2	12	15	0.018748
2	12	16	0.018084
2	12	17	0.018246
2	12	18	0.02126
2	12	19	0.02981
2	12	20	0.02124
2	12	21	0.019428
2	12	22	0.018608
2	12	23	0.017212
2	13	0	0.016915
2	13	1	0.014872
2	13	2	0.014436
2	13	3	0.015134
2	13	4	0.015296
2	13	5	0.016332
2	13	6	0.018408
2	13	7	0.0319
2	13	8	0.026512
2	13	9	0.02422
2	13	10	0.023984
2	13	11	0.021948
2	13	12	0.019624
2	13	13	0.018598
2	13	14	0.01796
2	13	15	0.017452
2	13	16	0.017486
2	13	17	0.017264
2	13	18	0.021304
2	13	19	0.032526
2	13	20	0.023
2	13	21	0.01959
2	13	22	0.017478
2	13	23	0.016008
2	14	0	0.01483
2	14	1	0.012496
2	14	2	0.011768
2	14	3	0.011624
2	14	4	0.012592
2	14	5	0.013142
2	14	6	0.017014
2	14	7	0.029902
2	14	8	0.026012
2	14	9	0.021526
2	14	10	0.020742
2	14	11	0.020034
2	14	12	0.018798
2	14	13	0.018352
2	14	14	0.017796
2	14	15	0.016918
2	14	16	0.01703
2	14	17	0.017214
2	14	18	0.020644
2	14	19	0.029424
2	14	20	0.021336
2	14	21	0.019362
2	14	22	0.018206
2	14	23	0.016514
2	15	0	0.015512
2	15	1	0.014286
2	15	2	0.013166
2	15	3	0.012738
2	15	4	0.013244
2	15	5	0.014686
2	15	6	0.016792
2	15	7	0.020834
2	15	8	0.020666
2	15	9	0.020182
2	15	10	0.019714
2	15	11	0.01941
2	15	12	0.018862
2	15	13	0.018576
2	15	14	0.018122
2	15	15	0.018348
2	15	16	0.018966
2	15	17	0.01999
2	15	18	0.024822
2	15	19	0.035324
2	15	20	0.024292
2	15	21	0.0212
2	15	22	0.019772
2	15	23	0.018376
2	16	0	0.015805
2	16	1	0.015266
2	16	2	0.014432
2	16	3	0.01402
2	16	4	0.014178
2	16	5	0.01499
2	16	6	0.016652
2	16	7	0.022658
2	16	8	0.022628
2	16	9	0.023678
2	16	10	0.023816
2	16	11	0.021802
2	16	12	0.020824
2	16	13	0.019272
2	16	14	0.019106
2	16	15	0.018274
2	16	16	0.01804
2	16	17	0.017896
2	16	18	0.021294
2	16	19	0.027782
2	16	20	0.020538
2	16	21	0.018966
2	16	22	0.017556
2	16	23	0.015968
2	17	0	0.014417
2	17	1	0.012466
2	17	2	0.01197
2	17	3	0.01141
2	17	4	0.011534
2	17	5	0.012538
2	17	6	0.01498
2	17	7	0.019334
2	17	8	0.019166
2	17	9	0.019674
2	17	10	0.020994
2	17	11	0.021466
2	17	12	0.020066
2	17	13	0.019364
2	17	14	0.018742
2	17	15	0.018674
2	17	16	0.018678
2	17	17	0.01891
2	17	18	0.020506
2	17	19	0.030808
2	17	20	0.019922
2	17	21	0.0184
2	17	22	0.016944
2	17	23	0.014972
2	18	0	0.013103
2	18	1	0.012224
2	18	2	0.011812
2	18	3	0.011186
2	18	4	0.01103
2	18	5	0.012104
2	18	6	0.014254
2	18	7	0.020506
2	18	8	0.020422
2	18	9	0.019712
2	18	10	0.01996
2	18	11	0.019612
2	18	12	0.019176
2	18	13	0.018988
2	18	14	0.020266
2	18	15	0.019496
2	18	16	0.018296
2	18	17	0.018386
2	18	18	0.020192
2	18	19	0.026504
2	18	20	0.019886
2	18	21	0.018574
2	18	22	0.017496
2	18	23	0.01383
2	19	0	0.011966
2	19	1	0.010784
2	19	2	0.009948
2	19	3	0.009994
2	19	4	0.010602
2	19	5	0.01204
2	19	6	0.014666
2	19	7	0.021958
2	19	8	0.021618
2	19	9	0.021638
2	19	10	0.022604
2	19	11	0.02335
2	19	12	0.02253
2	19	13	0.02196
2	19	14	0.022136
2	19	15	0.021992
2	19	16	0.02276
2	19	17	0.023146
2	19	18	0.02602
2	19	19	0.03965
2	19	20	0.026324
2	19	21	0.023098
2	19	22	0.021226
2	19	23	0.017554
2	20	0	0.01509
2	20	1	0.015006
2	20	2	0.01334
2	20	3	0.012348
2	20	4	0.012448
2	20	5	0.013682
2	20	6	0.015806
2	20	7	0.023708
2	20	8	0.019668
2	20	9	0.019252
2	20	10	0.019712
2	20	11	0.019578
2	20	12	0.01933
2	20	13	0.01954
2	20	14	0.020102
2	20	15	0.01987
2	20	16	0.020288
2	20	17	0.020634
2	20	18	0.023908
2	20	19	0.039454
2	20	20	0.026316
2	20	21	0.022586
2	20	22	0.020152
2	20	23	0.018964
2	21	0	0.016863
2	21	1	0.015316
2	21	2	0.014994
2	21	3	0.014174
2	21	4	0.01354
2	21	5	0.015566
2	21	6	0.018274
2	21	7	0.036776
2	21	8	0.027348
2	21	9	0.025014
2	21	10	0.024518
2	21	11	0.022632
2	21	12	0.02128
2	21	13	0.020348
2	21	14	0.019606
2	21	15	0.01917
2	21	16	0.019266
2	21	17	0.0201
2	21	18	0.02563
2	21	19	0.03882
2	21	20	0.024978
2	21	21	0.022102
2	21	22	0.01969
2	21	23	0.018454
2	22	0	0.017303
2	22	1	0.016886
2	22	2	0.015974
2	22	3	0.015842
2	22	4	0.01588
2	22	5	0.016418
2	22	6	0.019514
2	22	7	0.032544
2	22	8	0.028172
2	22	9	0.028196
2	22	10	0.026448
2	22	11	0.024104
2	22	12	0.022714
2	22	13	0.021236
2	22	14	0.021212
2	22	15	0.02042
2	22	16	0.02198
2	22	17	0.02045
2	22	18	0.022256
2	22	19	0.030952
2	22	20	0.0214
2	22	21	0.020086
2	22	22	0.018392
2	22	23	0.01637
2	23	0	0.014793
2	23	1	0.011802
2	23	2	0.009218
2	23	3	0.00867
2	23	4	0.008918
2	23	5	0.009922
2	23	6	0.01336
2	23	7	0.021788
2	23	8	0.019708
2	23	9	0.019206
2	23	10	0.020122
2	23	11	0.018984
2	23	12	0.017886
2	23	13	0.01673
2	23	14	0.016902
2	23	15	0.016304
2	23	16	0.016532
2	23	17	0.016516
2	23	18	0.018908
2	23	19	0.025164
2	23	20	0.019982
2	23	21	0.019672
2	23	22	0.018976
2	23	23	0.01597
2	24	0	0.013921
2	24	1	0.012692
2	24	2	0.010882
2	24	3	0.010386
2	24	4	0.011724
2	24	5	0.013932
2	24	6	0.016294
2	24	7	0.021172
2	24	8	0.021392
2	24	9	0.02336
2	24	10	0.022568
2	24	11	0.020482
2	24	12	0.019568
2	24	13	0.019122
2	24	14	0.019196
2	24	15	0.019928
2	24	16	0.019716
2	24	17	0.020672
2	24	18	0.022836
2	24	19	0.03493
2	24	20	0.02393
2	24	21	0.020686
2	24	22	0.01892
2	24	23	0.017638
2	25	0	0.016337
2	25	1	0.01408
2	25	2	0.013736
2	25	3	0.013344
2	25	4	0.01433
2	25	5	0.015734
2	25	6	0.017534
2	25	7	0.030074
2	25	8	0.026784
2	25	9	0.02394
2	25	10	0.022604
2	25	11	0.019588
2	25	12	0.017884
2	25	13	0.017286
2	25	14	0.016878
2	25	15	0.01638
2	25	16	0.016508
2	25	17	0.016172
2	25	18	0.017914
2	25	19	0.026378
2	25	20	0.021052
2	25	21	0.01858
2	25	22	0.017222
2	25	23	0.01533
2	26	0	0.015152
2	26	1	0.012316
2	26	2	0.011076
2	26	3	0.011266
2	26	4	0.012376
2	26	5	0.014022
2	26	6	0.016248
2	26	7	0.03159
2	26	8	0.02627
2	26	9	0.022156
2	26	10	0.021012
2	26	11	0.020098
2	26	12	0.018914
2	26	13	0.018858
2	26	14	0.01814
2	26	15	0.017978
2	26	16	0.017776
2	26	17	0.018116
2	26	18	0.021862
2	26	19	0.035466
2	26	20	0.026352
2	26	21	0.025024
2	26	22	0.021266
2	26	23	0.017886
2	27	0	0.015105
2	27	1	0.014062
2	27	2	0.012484
2	27	3	0.01259
2	27	4	0.013078
2	27	5	0.015176
2	27	6	0.016912
2	27	7	0.027066
2	27	8	0.024948
2	27	9	0.022344
2	27	10	0.021354
2	27	11	0.019722
2	27	12	0.018976
2	27	13	0.018606
2	27	14	0.019068
2	27	15	0.018998
2	27	16	0.019872
2	27	17	0.020282
2	27	18	0.020856
2	27	19	0.031638
2	27	20	0.022356
2	27	21	0.019742
2	27	22	0.016612
2	27	23	0.014818
2	28	0	0.012806
2	28	1	0.011622
2	28	2	0.01033
2	28	3	0.010106
2	28	4	0.010506
2	28	5	0.012074
2	28	6	0.015254
2	28	7	0.029674
2	28	8	0.022974
2	28	9	0.022078
2	28	10	0.022002
2	28	11	0.021462
2	28	12	0.021098
2	28	13	0.01996
2	28	14	0.020762
2	28	15	0.020758
2	28	16	0.020688
2	28	17	0.021232
2	28	18	0.02284
2	28	19	0.03211
2	28	20	0.022782
2	28	21	0.019792
2	28	22	0.018146
2	28	23	0.016086
3	1	0	0.014192
3	1	1	0.012732
3	1	2	0.012188
3	1	3	0.011058
3	1	4	0.011502
3	1	5	0.013058
3	1	6	0.015168
3	1	7	0.022752
3	1	8	0.021166
3	1	9	0.020542
3	1	10	0.022698
3	1	11	0.020402
3	1	12	0.020022
3	1	13	0.020646
3	1	14	0.022072
3	1	15	0.02148
3	1	16	0.02172
3	1	17	0.020324
3	1	18	0.021276
3	1	19	0.03408
3	1	20	0.021556
3	1	21	0.019328
3	1	22	0.018044
3	1	23	0.015478
3	2	0	0.015164
3	2	1	0.0134
3	2	2	0.0123
3	2	3	0.011862
3	2	4	0.012254
3	2	5	0.013482
3	2	6	0.015188
3	2	7	0.024678
3	2	8	0.021024
3	2	9	0.020562
3	2	10	0.021696
3	2	11	0.02088
3	2	12	0.020182
3	2	13	0.019228
3	2	14	0.019412
3	2	15	0.019234
3	2	16	0.019938
3	2	17	0.019542
3	2	18	0.021238
3	2	19	0.034696
3	2	20	0.023786
3	2	21	0.020652
3	2	22	0.019174
3	2	23	0.017844
3	3	0	0.016373
3	3	1	0.014686
3	3	2	0.012792
3	3	3	0.012358
3	3	4	0.012326
3	3	5	0.013844
3	3	6	0.014818
3	3	7	0.0217
3	3	8	0.02103
3	3	9	0.019864
3	3	10	0.019438
3	3	11	0.018784
3	3	12	0.018768
3	3	13	0.019596
3	3	14	0.019232
3	3	15	0.019172
3	3	16	0.019564
3	3	17	0.02006
3	3	18	0.021272
3	3	19	0.02978
3	3	20	0.02126
3	3	21	0.019444
3	3	22	0.018438
3	3	23	0.01513
3	4	0	0.014321
3	4	1	0.012862
3	4	2	0.011838
3	4	3	0.01217
3	4	4	0.013056
3	4	5	0.015188
3	4	6	0.018028
3	4	7	0.028018
3	4	8	0.026998
3	4	9	0.02632
3	4	10	0.027904
3	4	11	0.027388
3	4	12	0.026818
3	4	13	0.024694
3	4	14	0.023926
3	4	15	0.023694
3	4	16	0.023584
3	4	17	0.024314
3	4	18	0.03474
3	4	19	0.058726
3	4	20	0.04095
3	4	21	0.034596
3	4	22	0.0248
3	4	23	0.01966
3	5	0	0.016898
3	5	1	0.016024
3	5	2	0.014958
3	5	3	0.014858
3	5	4	0.01504
3	5	5	0.017448
3	5	6	0.025422
3	5	7	0.150154
3	5	8	0.127148
3	5	9	0.05623
3	5	10	0.029878
3	5	11	0.025098
3	5	12	0.023866
3	5	13	0.022038
3	5	14	0.02185
3	5	15	0.02081
3	5	16	0.02145
3	5	17	0.02258
3	5	18	0.02539
3	5	19	0.038176
3	5	20	0.029094
3	5	21	0.024006
3	5	22	0.02182
3	5	23	0.01916
3	6	0	0.017757
3	6	1	0.01453
3	6	2	0.014038
3	6	3	0.013312
3	6	4	0.013464
3	6	5	0.015302
3	6	6	0.019198
3	6	7	0.038526
3	6	8	0.02658
3	6	9	0.021572
3	6	10	0.02178
3	6	11	0.02088
3	6	12	0.02071
3	6	13	0.019954
3	6	14	0.019474
3	6	15	0.0191
3	6	16	0.019052
3	6	17	0.019588
3	6	18	0.021398
3	6	19	0.035454
3	6	20	0.024076
3	6	21	0.020516
3	6	22	0.018654
3	6	23	0.01709
3	7	0	0.015835
3	7	1	0.012884
3	7	2	0.012372
3	7	3	0.011732
3	7	4	0.012124
3	7	5	0.013266
3	7	6	0.015978
3	7	7	0.033086
3	7	8	0.028816
3	7	9	0.02271
3	7	10	0.02181
3	7	11	0.020848
3	7	12	0.020144
3	7	13	0.019278
3	7	14	0.019096
3	7	15	0.019332
3	7	16	0.019868
3	7	17	0.019038
3	7	18	0.020056
3	7	19	0.029848
3	7	20	0.02043
3	7	21	0.01806
3	7	22	0.016818
3	7	23	0.015132
3	8	0	0.012884
3	8	1	0.011312
3	8	2	0.010344
3	8	3	0.010058
3	8	4	0.011092
3	8	5	0.012704
3	8	6	0.015722
3	8	7	0.023954
3	8	8	0.022102
3	8	9	0.019352
3	8	10	0.020952
3	8	11	0.020982
3	8	12	0.02107
3	8	13	0.018752
3	8	14	0.018542
3	8	15	0.017886
3	8	16	0.018364
3	8	17	0.018026
3	8	18	0.018694
3	8	19	0.025042
3	8	20	0.02004
3	8	21	0.017362
3	8	22	0.016314
3	8	23	0.01447
3	9	0	0.012567
3	9	1	0.01133
3	9	2	0.00963
3	9	3	0.00958
3	9	4	0.009536
3	9	5	0.011514
3	9	6	0.013896
3	9	7	0.016316
3	9	8	0.016162
3	9	9	0.018002
3	9	10	0.019132
3	9	11	0.020022
3	9	12	0.020636
3	9	13	0.020644
3	9	14	0.021694
3	9	15	0.022114
3	9	16	0.023648
3	9	17	0.024846
3	9	18	0.025182
3	9	19	0.034434
3	9	20	0.028088
3	9	21	0.02284
3	9	22	0.020836
3	9	23	0.019408
3	10	0	0.017732
3	10	1	0.017108
3	10	2	0.014928
3	10	3	0.014304
3	10	4	0.01482
3	10	5	0.015428
3	10	6	0.016766
3	10	7	0.020344
3	10	8	0.021168
3	10	9	0.021734
3	10	10	0.023262
3	10	11	0.023712
3	10	12	0.025192
3	10	13	0.025516
3	10	14	0.025364
3	10	15	0.025528
3	10	16	0.027464
3	10	17	0.02612
3	10	18	0.027252
3	10	19	0.036056
3	10	20	0.028976
3	10	21	0.024172
3	10	22	0.020378
3	10	23	0.01958
3	11	0	0.017172
3	11	1	0.017228
3	11	2	0.015646
3	11	3	0.013744
3	11	4	0.01269
3	11	5	0.014832
3	11	6	0.018088
3	11	7	0.021084
3	11	8	0.020434
3	11	9	0.02223
3	11	10	0.0254
3	11	11	0.026578
3	11	12	0.024526
3	11	13	0.024682
3	11	14	0.024976
3	11	15	0.02374
3	11	16	0.023832
3	11	17	0.024256
3	11	18	0.027342
3	11	19	0.03234
3	11	20	0.02521
3	11	21	0.020978
3	11	22	0.01889
3	11	23	0.01728
3	12	0	0.015777
3	12	1	0.016292
3	12	2	0.0145
3	12	3	0.01437
3	12	4	0.014928
3	12	5	0.016844
3	12	6	0.024026
3	12	7	0.025974
3	12	8	0.022712
3	12	9	0.02423
3	12	10	0.023816
3	12	11	0.02328
3	12	12	0.022982
3	12	13	0.02242
3	12	14	0.0232
3	12	15	0.02388
3	12	16	0.02474
3	12	17	0.026282
3	12	18	0.02828
3	12	19	0.034298
3	12	20	0.027526
3	12	21	0.021906
3	12	22	0.020154
3	12	23	0.018462
3	13	0	0.015646
3	13	1	0.015922
3	13	2	0.014528
3	13	3	0.013646
3	13	4	0.014332
3	13	5	0.016592
3	13	6	0.025506
3	13	7	0.027952
3	13	8	0.02289
3	13	9	0.023704
3	13	10	0.023388
3	13	11	0.023026
3	13	12	0.023098
3	13	13	0.023762
3	13	14	0.024106
3	13	15	0.02503
3	13	16	0.02597
3	13	17	0.029094
3	13	18	0.02999
3	13	19	0.03276
3	13	20	0.027072
3	13	21	0.020766
3	13	22	0.019452
3	13	23	0.0172
3	14	0	0.015299
3	14	1	0.014858
3	14	2	0.013526
3	14	3	0.012916
3	14	4	0.013578
3	14	5	0.015038
3	14	6	0.022296
3	14	7	0.025892
3	14	8	0.021326
3	14	9	0.020642
3	14	10	0.020646
3	14	11	0.020346
3	14	12	0.020112
3	14	13	0.020918
3	14	14	0.021664
3	14	15	0.022912
3	14	16	0.023876
3	14	17	0.024394
3	14	18	0.027958
3	14	19	0.033382
3	14	20	0.02641
3	14	21	0.021446
3	14	22	0.018576
3	14	23	0.016516
3	15	0	0.014461
3	15	1	0.01394
3	15	2	0.012516
3	15	3	0.01186
3	15	4	0.012676
3	15	5	0.015426
3	15	6	0.022508
3	15	7	0.023366
3	15	8	0.022636
3	15	9	0.023716
3	15	10	0.02361
3	15	11	0.02353
3	15	12	0.024688
3	15	13	0.02559
3	15	14	0.026332
3	15	15	0.027046
3	15	16	0.031024
3	15	17	0.033586
3	15	18	0.031282
3	15	19	0.033504
3	15	20	0.033812
3	15	21	0.024732
3	15	22	0.019396
3	15	23	0.016638
3	16	0	0.016893
3	16	1	0.014596
3	16	2	0.0134
3	16	3	0.01319
3	16	4	0.014382
3	16	5	0.016848
3	16	6	0.021152
3	16	7	0.022704
3	16	8	0.024898
3	16	9	0.027414
3	16	10	0.026394
3	16	11	0.024974
3	16	12	0.025704
3	16	13	0.027828
3	16	14	0.02928
3	16	15	0.033496
3	16	16	0.037622
3	16	17	0.033502
3	16	18	0.029496
3	16	19	0.033834
3	16	20	0.032992
3	16	21	0.0276
3	16	22	0.023646
3	16	23	0.019552
3	17	0	0.018327
3	17	1	0.015892
3	17	2	0.014544
3	17	3	0.014374
3	17	4	0.015476
3	17	5	0.017468
3	17	6	0.02165
3	17	7	0.025236
3	17	8	0.02813
3	17	9	0.029238
3	17	10	0.027578
3	17	11	0.025744
3	17	12	0.025282
3	17	13	0.026834
3	17	14	0.029156
3	17	15	0.032262
3	17	16	0.037492
3	17	17	0.035626
3	17	18	0.029956
3	17	19	0.035418
3	17	20	0.032906
3	17	21	0.027694
3	17	22	0.023338
3	17	23	0.020814
3	18	0	0.019454
3	18	1	0.017346
3	18	2	0.017176
3	18	3	0.017062
3	18	4	0.01735
3	18	5	0.020236
3	18	6	0.03308
3	18	7	0.033314
3	18	8	0.029764
3	18	9	0.029928
3	18	10	0.029478
3	18	11	0.028676
3	18	12	0.027536
3	18	13	0.0278
3	18	14	0.028614
3	18	15	0.030862
3	18	16	0.03082
3	18	17	0.028678
3	18	18	0.0273
3	18	19	0.029334
3	18	20	0.028138
3	18	21	0.02521
3	18	22	0.022318
3	18	23	0.01892
3	19	0	0.014788
3	19	1	0.013386
3	19	2	0.012474
3	19	3	0.011934
3	19	4	0.012402
3	19	5	0.014884
3	19	6	0.021972
3	19	7	0.024656
3	19	8	0.022254
3	19	9	0.021844
3	19	10	0.022164
3	19	11	0.021726
3	19	12	0.021976
3	19	13	0.022982
3	19	14	0.025288
3	19	15	0.028274
3	19	16	0.031332
3	19	17	0.028344
3	19	18	0.026566
3	19	19	0.025864
3	19	20	0.02667
3	19	21	0.02223
3	19	22	0.01904
3	19	23	0.016618
3	20	0	0.014219
3	20	1	0.013314
3	20	2	0.012844
3	20	3	0.01302
3	20	4	0.014456
3	20	5	0.016548
3	20	6	0.020776
3	20	7	0.02234
3	20	8	0.021578
3	20	9	0.02164
3	20	10	0.021814
3	20	11	0.022982
3	20	12	0.023386
3	20	13	0.02431
3	20	14	0.026198
3	20	15	0.029928
3	20	16	0.032098
3	20	17	0.031676
3	20	18	0.030836
3	20	19	0.03935
3	20	20	0.037232
3	20	21	0.026892
3	20	22	0.023396
3	20	23	0.019462
3	21	0	0.018328
3	21	1	0.016046
3	21	2	0.01444
3	21	3	0.01486
3	21	4	0.016178
3	21	5	0.018212
3	21	6	0.025136
3	21	7	0.027258
3	21	8	0.02516
3	21	9	0.02569
3	21	10	0.024392
3	21	11	0.022272
3	21	12	0.022066
3	21	13	0.024076
3	21	14	0.02641
3	21	15	0.03092
3	21	16	0.035746
3	21	17	0.028628
3	21	18	0.028874
3	21	19	0.035254
3	21	20	0.030782
3	21	21	0.023816
3	21	22	0.021542
3	21	23	0.01752
3	22	0	0.014966
3	22	1	0.013358
3	22	2	0.012844
3	22	3	0.01262
3	22	4	0.013974
3	22	5	0.016622
3	22	6	0.025818
3	22	7	0.023456
3	22	8	0.022498
3	22	9	0.025122
3	22	10	0.026534
3	22	11	0.024848
3	22	12	0.02539
3	22	13	0.025756
3	22	14	0.025466
3	22	15	0.029026
3	22	16	0.028238
3	22	17	0.023788
3	22	18	0.0237
3	22	19	0.024976
3	22	20	0.023826
3	22	21	0.02006
3	22	22	0.01837
3	22	23	0.01472
3	23	0	0.011459
3	23	1	0.009728
3	23	2	0.008288
3	23	3	0.008738
3	23	4	0.009166
3	23	5	0.011662
3	23	6	0.017678
3	23	7	0.018884
3	23	8	0.019024
3	23	9	0.019148
3	23	10	0.019384
3	23	11	0.019182
3	23	12	0.019786
3	23	13	0.021538
3	23	14	0.02198
3	23	15	0.02338
3	23	16	0.024384
3	23	17	0.022994
3	23	18	0.02134
3	23	19	0.025826
3	23	20	0.027198
3	23	21	0.02064
3	23	22	0.016988
3	23	23	0.014946
3	24	0	0.012175
3	24	1	0.010636
3	24	2	0.009824
3	24	3	0.010284
3	24	4	0.010622
3	24	5	0.013128
3	24	6	0.016218
3	24	7	0.017486
3	24	8	0.019074
3	24	9	0.020198
3	24	10	0.022004
3	24	11	0.022724
3	24	12	0.024664
3	24	13	0.027434
3	24	14	0.03173
3	24	15	0.03746
3	24	16	0.039122
3	24	17	0.035098
3	24	18	0.029322
3	24	19	0.03051
3	24	20	0.029722
3	24	21	0.02169
3	24	22	0.020554
3	24	23	0.01822
3	25	0	0.016882
3	25	1	0.015664
3	25	2	0.01488
3	25	3	0.013982
3	25	4	0.015586
3	25	5	0.016872
3	25	6	0.021278
[truncated: 6,761 more rows]

## Sheet: LCOH Components
Parameter	Alkaline	PEM	SOC
Policy Growth
Levelized variable operating cost, w	1.47129	1.45262	1.33714
Levelized fixed operating cost, f	0.0935335	0.09017	0.145278
Levelized cost of capacity, c	0.300215	0.241182	0.388584
Tax factor, Δ	1.09291	1.09291	1.09291
Levelized cost of hydrogen, LCOH	1.89293	1.80638	1.9071
Policy Target
Levelized variable operating cost, w	1.3898	1.37537	1.27297
Levelized fixed operating cost, f	0.0717193	0.0725201	0.105587
Levelized cost of capacity, c	0.230198	0.193973	0.282419
Tax factor, Δ	1.09291	1.09291	1.09291
Levelized cost of hydrogen, LCOH	1.71311	1.65989	1.68721
Industry Target
Levelized variable operating cost, w	1.347	1.33594	1.23684
Levelized fixed operating cost, f	0.0626984	0.0646579	0.0899849
Levelized cost of capacity, c	0.201243	0.172944	0.240687
Tax factor, Δ	1.09291	1.09291	1.09291
Levelized cost of hydrogen, LCOH	1.62964	1.58961	1.58987

## Sheet: Sensitivity Analysis
Alkaline: Past Growth																								PEM: Past Growth																								SOC: Past Growth
		Change in Electricity Price Variance																								Change in Electricity Price Variance
		-0.50	-0.45	-0.40	-0.35	-0.30	-0.25	-0.20	-0.15	-0.10	-0.05	0.00	0.05	0.10	0.15	0.20	0.25	0.30	0.35	0.40	0.45	0.50				-0.50	-0.45	-0.40	-0.35	-0.30	-0.25	-0.20	-0.15	-0.10	-0.05	0.00	0.05	0.10	0.15	0.20	0.25	0.30	0.35	0.40	0.45	0.50
Change in Electricity Price Average	0.50	2.68261	2.6544	2.62543	2.5957	2.56529	2.53422	2.50259	2.47048	2.43788	2.40478	2.37127	2.33732	2.30295	2.26819	2.23308	2.19765	2.16187	2.12575	2.08936	2.05272	2.01581		Change in Electricity Price Average	0.50	2.60932	2.57863	2.54713	2.51496	2.48215	2.44871	2.41473	2.38019	2.34513	2.30964	2.27371	2.23733	2.20062	2.16354	2.12612	2.08838	2.05026	2.01182	1.97313	1.93417	1.895		Change in Electricity Price Average	0.50
	0.45	2.62257	2.59555	2.56784	2.53939	2.51029	2.48055	2.45025	2.41947	2.38824	2.35652	2.32439	2.29186	2.25892	2.22561	2.19192	2.15793	2.12363	2.089	2.05406	2.01888	1.98346			0.45	2.54957	2.52021	2.49005	2.45921	2.42778	2.39573	2.36315	2.33005	2.29645	2.26239	2.22794	2.19307	2.1578	2.12223	2.08631	2.05009	2.01355	1.97665	1.93947	1.90207	1.86443			0.45
	0.40	2.56244	2.53662	2.51013	2.48296	2.45516	2.42674	2.39776	2.3683	2.3384	2.30808	2.27732	2.24618	2.21468	2.18279	2.15056	2.11798	2.08512	2.05198	2.01853	1.98479	1.95084			0.40	2.48973	2.46168	2.43285	2.40333	2.37325	2.3426	2.31141	2.27975	2.24759	2.21498	2.18197	2.14859	2.11482	2.08069	2.04629	2.01156	1.97656	1.94124	1.9056	1.86971	1.83361			0.40
	0.35	2.50222	2.47758	2.45228	2.42639	2.39986	2.37277	2.34511	2.31697	2.2884	2.25944	2.23007	2.2003	2.1702	2.13974	2.10894	2.07781	2.04637	2.01468	1.98271	1.95046	1.91795			0.35	2.42977	2.40302	2.37552	2.34734	2.31859	2.28933	2.25952	2.22926	2.19855	2.16739	2.13582	2.10389	2.07162	2.03897	2.00603	1.97281	1.9393	1.90553	1.87147	1.83711	1.80253			0.35
	0.30	2.4419	2.41843	2.39433	2.36967	2.34442	2.31862	2.29229	2.26548	2.23822	2.21059	2.1826	2.15421	2.12548	2.09644	2.06707	2.03737	2.00738	1.9771	1.94658	1.91582	1.8848			0.30	2.36971	2.34424	2.31806	2.29122	2.26379	2.23587	2.20747	2.17859	2.1493	2.11959	2.08947	2.05898	2.02817	1.99704	1.96555	1.93381	1.9018	1.86953	1.83701	1.80424	1.77119			0.30
	0.25	2.38149	2.35916	2.33626	2.31279	2.28882	2.26429	2.23928	2.2138	2.18786	2.16154	2.13489	2.1079	2.08054	2.05287	2.02492	1.99666	1.9681	1.93927	1.91017	1.88085	1.85131			0.25	2.30952	2.28534	2.26046	2.23495	2.20885	2.18227	2.15524	2.12775	2.09985	2.07157	2.0429	2.01386	1.98449	1.95483	1.92485	1.89456	1.86403	1.83326	1.80225	1.77101	1.73954			0.25
	0.20	2.32099	2.29979	2.27805	2.25579	2.23304	2.2098	2.18608	2.16191	2.1373	2.11231	2.08697	2.06132	2.03536	2.00907	1.98249	1.95565	1.92852	1.90113	1.87347	1.84557	1.81747			0.20	2.24924	2.2263	2.2027	2.17852	2.15376	2.1285	2.10281	2.07673	2.05021	2.02333	1.9961	1.96851	1.94058	1.91236	1.88386	1.85508	1.82601	1.79671	1.7672	1.73746	1.70751			0.20
	0.15	2.26038	2.2403	2.21972	2.19864	2.1771	2.15512	2.13267	2.10981	2.08653	2.06286	2.03884	2.01451	1.9899	1.965	1.9398	1.91433	1.88862	1.86266	1.83644	1.80999	1.7833			0.15	2.18884	2.16711	2.14481	2.12192	2.0985	2.07457	2.05021	2.02547	2.00036	1.97487	1.94905	1.9229	1.89642	1.86964	1.84258	1.81528	1.78772	1.75989	1.73183	1.7036	1.67515			0.15
	0.10	2.19965	2.18071	2.16125	2.14134	2.121	2.10023	2.07906	2.05747	2.03551	2.01317	1.99047	1.96746	1.94418	1.92063	1.89682	1.87273	1.8484	1.82384	1.79905	1.77403	1.74879			0.10	2.12833	2.10781	2.08675	2.06515	2.04305	2.02046	1.99743	1.97402	1.95028	1.92618	1.90175	1.87701	1.85198	1.82665	1.80104	1.77517	1.74909	1.72276	1.69619	1.6694	1.64246			0.10
	0.05	2.1388	2.12098	2.10264	2.08389	2.06473	2.04516	2.02523	2.00492	1.98423	1.96321	1.94185	1.92016	1.89819	1.87597	1.85351	1.83082	1.80786	1.78468	1.76129	1.73769	1.71389			0.05	2.0677	2.04837	2.02853	2.00821	1.98739	1.96614	1.94445	1.92237	1.89996	1.87724	1.8542	1.83086	1.80724	1.78335	1.75919	1.73478	1.71012	1.68527	1.66019	1.6349	1.6094			0.05
	0.00	2.0778	2.06111	2.04391	2.02627	2.00828	1.9899	1.97118	1.95213	1.93272	1.91298	1.89293	1.87258	1.85193	1.83102	1.80989	1.78853	1.76697	1.74517	1.72316	1.70095	1.67857			0.00	2.00694	1.98879	1.97015	1.95108	1.93155	1.9116	1.89124	1.8705	1.84941	1.82804	1.80638	1.78443	1.7622	1.73973	1.71701	1.69404	1.67084	1.64742	1.6238	1.6	1.576			0.00
	-0.05	2.01666	2.00109	1.98501	1.96851	1.95164	1.93445	1.91692	1.89907	1.88093	1.86247	1.8437	1.82467	1.80536	1.78577	1.76596	1.74592	1.72569	1.70527	1.68465	1.66382	1.64281			-0.05	1.94607	1.92906	1.91162	1.89375	1.8755	1.85683	1.83779	1.81838	1.79863	1.77858	1.75827	1.7377	1.71687	1.69578	1.67447	1.65294	1.63119	1.60922	1.58704	1.56468	1.54216			-0.05
	-0.10	1.95542	1.94089	1.92595	1.91058	1.89483	1.87878	1.86243	1.84579	1.82885	1.81166	1.79418	1.77642	1.75843	1.74017	1.72168	1.70297	1.68405	1.66497	1.6457	1.62626	1.60663			-0.10	1.88507	1.86919	1.85292	1.83625	1.81921	1.80183	1.78408	1.76599	1.74758	1.72886	1.70987	1.69065	1.67119	1.6515	1.63158	1.61145	1.59113	1.5706	1.54988	1.52897	1.50788			-0.10
	-0.15	1.89405	1.88054	1.8667	1.85245	1.83784	1.82291	1.80771	1.79224	1.77651	1.76053	1.74431	1.72784	1.71112	1.69418	1.67702	1.65963	1.64204	1.62426	1.60632	1.58822	1.56997			-0.15	1.82392	1.80918	1.79404	1.77855	1.76273	1.74657	1.7301	1.71331	1.69622	1.67884	1.66118	1.64328	1.62517	1.60685	1.58833	1.56958	1.55065	1.53155	1.51226	1.49279	1.47316			-0.15
	-0.20	1.83254	1.82006	1.80723	1.79411	1.78062	1.76683	1.75275	1.73844	1.72389	1.70911	1.69409	1.67888	1.66344	1.64778	1.63191	1.61585	1.59959	1.58314	1.56652	1.54973	1.5328			-0.20	1.76259	1.74899	1.73499	1.72065	1.70601	1.69107	1.67584	1.66033	1.64453	1.62847	1.61216	1.59559	1.5788	1.56181	1.54464	1.5273	1.50976	1.49204	1.47416	1.45612	1.43793			-0.20
	-0.25	1.7709	1.7594	1.74761	1.73553	1.72317	1.7105	1.69756	1.68436	1.67097	1.65736	1.64355	1.62953	1.61534	1.60095	1.58637	1.57159	1.55664	1.54152	1.52623	1.51076	1.49516			-0.25	1.70109	1.68862	1.67575	1.66255	1.64907	1.63532	1.6213	1.60703	1.59252	1.57774	1.56274	1.54751	1.53206	1.5164	1.50056	1.48455	1.46839	1.45207	1.43557	1.41892	1.40214			-0.25
	-0.30	1.70909	1.69859	1.6878	1.67674	1.66544	1.6539	1.64208	1.63003	1.61775	1.60529	1.59265	1.57983	1.56683	1.55366	1.54034	1.52684	1.51317	1.49934	1.48537	1.47123	1.45695			-0.30	1.63943	1.62803	1.6163	1.60424	1.59189	1.5793	1.56647	1.55341	1.54013	1.52664	1.51292	1.49899	1.48487	1.47055	1.45605	1.44137	1.42653	1.41156	1.39645	1.3812	1.3658			-0.30
	-0.35	1.64715	1.6376	1.62779	1.61775	1.60747	1.59699	1.5863	1.57537	1.56422	1.55289	1.54138	1.52972	1.51791	1.50594	1.49381	1.48155	1.46915	1.4566	1.4439	1.43106	1.4181			-0.35	1.5776	1.56724	1.55661	1.54568	1.53447	1.52301	1.51134	1.49947	1.48739	1.47512	1.46268	1.45004	1.43721	1.42421	1.41103	1.39769	1.38419	1.37054	1.35676	1.34286	1.32884			-0.35
	-0.40	1.58501	1.57643	1.56758	1.55852	1.54926	1.5398	1.53015	1.52034	1.51033	1.50012	1.48975	1.47921	1.46854	1.45774	1.4468	1.43574	1.42454	1.41322	1.4018	1.39024	1.37856			-0.40	1.5156	1.50625	1.49666	1.48684	1.47676	1.46644	1.4559	1.44518	1.43429	1.42322	1.41198	1.40058	1.38904	1.37732	1.36545	1.35343	1.34126	1.32895	1.3165	1.30393	1.29124			-0.40
	-0.45	1.52269	1.51504	1.50716	1.49906	1.49078	1.48232	1.4737	1.46492	1.456	1.44693	1.43768	1.42827	1.41873	1.40905	1.39927	1.38938	1.37937	1.36925	1.35902	1.34868	1.33825			-0.45	1.45341	1.44506	1.43648	1.42769	1.41872	1.40953	1.40013	1.39055	1.38079	1.37089	1.36084	1.35065	1.34032	1.32985	1.31927	1.30853	1.29766	1.28667	1.27556	1.26432	1.25297			-0.45
	-0.50	1.4602	1.45342	1.44647	1.43934	1.43201	1.42454	1.41691	1.40915	1.40126	1.39323	1.38509	1.37682	1.36841	1.35986	1.3512	1.34243	1.33357	1.32462	1.31557	1.30643	1.2972			-0.50	1.39102	1.38364	1.37606	1.36829	1.36034	1.35223	1.34396	1.33551	1.3269	1.31813	1.30923	1.30021	1.29107	1.28181	1.27244	1.26295	1.25336	1.24366	1.23384	1.22391	1.21388			-0.50
Alkaline: Policy Target																								PEM: Policy Target																								SOC: Policy Target
		Change in Electricity Price Variance																								Change in Electricity Price Variance
		-0.50	-0.45	-0.40	-0.35	-0.30	-0.25	-0.20	-0.15	-0.10	-0.05	0.00	0.05	0.10	0.15	0.20	0.25	0.30	0.35	0.40	0.45	0.50				-0.50	-0.45	-0.40	-0.35	-0.30	-0.25	-0.20	-0.15	-0.10	-0.05	0.00	0.05	0.10	0.15	0.20	0.25	0.30	0.35	0.40	0.45	0.50
Change in Electricity Price Average	0.50	2.48632	2.45618	2.42533	2.39381	2.36166	2.32894	2.29564	2.26183	2.22758	2.19286	2.15773	2.12225	2.08641	2.05023	2.01365	1.97675	1.93958	1.90213	1.86444	1.82655	1.78844		Change in Electricity Price Average	0.50	2.44454	2.41246	2.37965	2.34613	2.31198	2.27727	2.242	2.20629	2.17013	2.13353	2.09647	2.05906	2.02131	1.98327	1.94496	1.90637	1.86751	1.82834	1.78888	1.74921	1.70934		Change in Electricity Price Average	0.50
	0.45	2.42917	2.40031	2.37074	2.34055	2.30973	2.27837	2.24646	2.21404	2.18118	2.1479	2.11418	2.08013	2.04572	2.01099	1.97594	1.94052	1.9048	1.86885	1.83262	1.79618	1.75957			0.45	2.38755	2.35682	2.32537	2.29325	2.26049	2.22721	2.19338	2.1591	2.12439	2.08928	2.05373	2.01779	1.98154	1.94497	1.90814	1.87105	1.83371	1.79611	1.75822	1.72007	1.68176			0.45
	0.40	2.37192	2.34435	2.31605	2.28716	2.25768	2.22765	2.19713	2.1661	2.13462	2.10275	2.07048	2.03781	2.00485	1.97156	1.93797	1.90407	1.86983	1.83532	1.8006	1.76562	1.73046			0.40	2.33047	2.30108	2.27097	2.24024	2.20889	2.17699	2.14462	2.11174	2.07849	2.04483	2.0108	1.97636	1.94157	1.90651	1.87115	1.83555	1.79971	1.76363	1.72732	1.69074	1.65394			0.40
	0.35	2.31456	2.28827	2.26125	2.23364	2.20549	2.17679	2.14763	2.11799	2.0879	2.05741	2.02657	1.99534	1.96377	1.93192	1.89977	1.86735	1.83463	1.80159	1.76832	1.73484	1.70114			0.35	2.27331	2.24522	2.21646	2.18709	2.15714	2.12665	2.09569	2.06427	2.03242	2.00022	1.96766	1.93474	1.90144	1.86784	1.83398	1.79985	1.76551	1.73093	1.69614	1.66114	1.6259			0.35
	0.30	2.2571	2.23207	2.20634	2.17999	2.15315	2.12579	2.09796	2.0697	2.041	2.0119	1.98244	1.95265	1.92251	1.89206	1.86136	1.83037	1.79914	1.76762	1.73582	1.70379	1.67159			0.30	2.21605	2.18925	2.16184	2.13381	2.10525	2.07616	2.0466	2.01662	1.9862	1.95543	1.92432	1.89289	1.86111	1.82898	1.7966	1.76397	1.73109	1.69802	1.66472	1.63124	1.59758			0.30
	0.25	2.19953	2.17574	2.15129	2.12623	2.10066	2.07464	2.04813	2.02122	1.99391	1.9662	1.93812	1.90974	1.88104	1.85201	1.82271	1.79317	1.76337	1.73334	1.70305	1.6725	1.64174			0.25	2.15868	2.13317	2.10708	2.0804	2.05321	2.02552	1.99735	1.96878	1.93981	1.91045	1.88079	1.85081	1.82053	1.78992	1.75901	1.72786	1.69647	1.66487	1.63308	1.60109	1.56894			0.25
	0.20	2.14184	2.11929	2.0961	2.07233	2.04803	2.0233	1.99814	1.97256	1.94661	1.92029	1.89361	1.8666	1.83931	1.81172	1.78383	1.7557	1.72735	1.69876	1.66995	1.64092	1.61164			0.20	2.1012	2.07698	2.05218	2.02685	2.00101	1.9747	1.94794	1.92075	1.89322	1.86531	1.83705	1.80852	1.77969	1.7506	1.7212	1.69152	1.66162	1.6315	1.60118	1.57069	1.54004			0.20
	0.15	2.08404	2.0627	2.04077	2.01827	1.99526	1.9718	1.94796	1.92371	1.8991	1.87415	1.84886	1.82325	1.79733	1.77116	1.74472	1.71799	1.69105	1.6639	1.63653	1.60896	1.58121			0.15	2.0436	2.02067	1.99716	1.97315	1.94865	1.92371	1.89834	1.87256	1.84641	1.81994	1.79313	1.76601	1.73864	1.711	1.68311	1.65494	1.62651	1.59788	1.56905	1.54003	1.51086			0.15
	0.10	2.02613	2.00598	1.98528	1.96405	1.94232	1.92014	1.89758	1.87467	1.85139	1.82778	1.80387	1.77964	1.75512	1.73032	1.7053	1.68002	1.65449	1.62874	1.60282	1.57669	1.55038			0.10	1.98586	1.96423	1.942	1.91929	1.89613	1.87253	1.84854	1.82416	1.79941	1.77434	1.74897	1.72329	1.69733	1.67115	1.64471	1.61806	1.59114	1.56398	1.53663	1.50911	1.4814			0.10
	0.05	1.96809	1.94911	1.92963	1.90964	1.8892	1.8683	1.84701	1.8254	1.80346	1.78118	1.75861	1.73577	1.71264	1.68924	1.66558	1.64172	1.61763	1.59331	1.56877	1.54409	1.51922			0.05	1.928	1.90763	1.8867	1.86527	1.84343	1.82117	1.79853	1.77554	1.75219	1.72852	1.70455	1.68032	1.6558	1.63103	1.60605	1.58084	1.55543	1.52979	1.50392	1.47786	1.45166			0.05
	0.00	1.90994	1.89212	1.87382	1.85507	1.83588	1.81626	1.79626	1.77591	1.75528	1.73435	1.71311	1.69161	1.66986	1.64784	1.62559	1.6031	1.58041	1.55753	1.53444	1.51114	1.48769			0.00	1.87	1.85088	1.83124	1.8111	1.79054	1.76963	1.74832	1.72669	1.70474	1.68246	1.65989	1.63706	1.61399	1.59065	1.56708	1.54333	1.51937	1.49522	1.47087	1.44631	1.42157			0.00
	-0.05	1.85166	1.83497	1.81784	1.80031	1.78235	1.76401	1.74529	1.72622	1.70686	1.68723	1.66734	1.64717	1.62677	1.60613	1.58526	1.56417	1.54286	1.52137	1.4997	1.47785	1.45581			-0.05	1.81184	1.79397	1.77559	1.75675	1.73748	1.71785	1.6979	1.67761	1.65702	1.63614	1.61497	1.59353	1.57187	1.54998	1.52785	1.5055	1.48299	1.46029	1.43741	1.41437	1.39114			-0.05
	-0.10	1.79325	1.77768	1.76171	1.74534	1.72862	1.71151	1.69407	1.67629	1.65821	1.63985	1.62127	1.60245	1.58337	1.56408	1.54458	1.52488	1.50496	1.48485	1.46457	1.44412	1.42352			-0.10	1.75355	1.73689	1.71976	1.7022	1.68422	1.66588	1.64723	1.62829	1.60904	1.58952	1.56975	1.54972	1.52944	1.50895	1.48827	1.46737	1.44627	1.425	1.40357	1.38198	1.36024			-0.10
	-0.15	1.73472	1.72024	1.7054	1.69019	1.67466	1.65879	1.64259	1.62609	1.60929	1.59221	1.5749	1.55738	1.53965	1.52168	1.50352	1.48518	1.46665	1.44794	1.42904	1.40998	1.39077			-0.15	1.69512	1.67963	1.66374	1.64743	1.63075	1.6137	1.59633	1.5787	1.5608	1.54262	1.52421	1.50557	1.4867	1.46761	1.44831	1.42885	1.40919	1.38935	1.36934	1.3492	1.32891			-0.15
	-0.20	1.67604	1.66265	1.64891	1.63485	1.62047	1.6058	1.59084	1.57558	1.56006	1.54427	1.52824	1.51199	1.49555	1.47892	1.4621	1.44509	1.42791	1.41057	1.39306	1.37539	1.35757			-0.20	1.63654	1.62221	1.60751	1.59245	1.57703	1.56127	1.54519	1.52884	1.51225	1.49543	1.47836	1.46107	1.44359	1.4259	1.40801	1.38992	1.37168	1.35328	1.33472	1.31599	1.29712			-0.20
	-0.25	1.61719	1.60489	1.59224	1.57929	1.56606	1.55255	1.5388	1.52478	1.5105	1.49599	1.48124	1.46627	1.4511	1.43576	1.42025	1.40459	1.38874	1.37273	1.35658	1.34029	1.32386			-0.25	1.57779	1.56461	1.55108	1.53723	1.52305	1.50856	1.49378	1.47872	1.46341	1.44789	1.43217	1.41622	1.40009	1.38377	1.36728	1.3506	1.33376	1.31675	1.29961	1.28233	1.2649			-0.25
	-0.30	1.55815	1.54695	1.53538	1.52352	1.51141	1.49906	1.48646	1.47364	1.4606	1.44733	1.43385	1.42016	1.40627	1.39221	1.37798	1.3636	1.34908	1.33443	1.31961	1.30466	1.28958			-0.30	1.5189	1.50682	1.49444	1.48176	1.4688	1.45556	1.44205	1.42827	1.41426	1.40002	1.38559	1.37099	1.3562	1.34123	1.32609	1.3108	1.29536	1.27975	1.264	1.24812	1.23212			-0.30
	-0.35	1.49895	1.48878	1.47831	1.46754	1.45652	1.44528	1.43383	1.42217	1.41032	1.39828	1.38604	1.3736	1.361	1.34822	1.33527	1.32217	1.30893	1.29557	1.28208	1.26847	1.25473			-0.35	1.45982	1.44885	1.43758	1.42605	1.41427	1.40225	1.38998	1.37747	1.36474	1.3518	1.33866	1.32534	1.31186	1.29824	1.28445	1.2705	1.25642	1.24221	1.22787	1.21338	1.19878			-0.35
	-0.40	1.43957	1.4304	1.42098	1.4113	1.40137	1.39122	1.38089	1.37037	1.35968	1.34881	1.33778	1.32659	1.31523	1.30371	1.29204	1.28022	1.26826	1.25618	1.24397	1.23166	1.21924			-0.40	1.40054	1.39066	1.3805	1.37009	1.35946	1.34861	1.33755	1.32629	1.31481	1.30315	1.2913	1.27928	1.26708	1.25475	1.24228	1.22969	1.21696	1.20409	1.19111	1.17801	1.1648			-0.40
	-0.45	1.38002	1.37181	1.36339	1.35477	1.34593	1.33687	1.32763	1.31821	1.30865	1.29893	1.28907	1.27906	1.26892	1.25864	1.24822	1.23767	1.22699	1.21619	1.20526	1.19422	1.18308			-0.45	1.34103	1.33224	1.32317	1.31386	1.30435	1.29464	1.28476	1.27469	1.26445	1.25404	1.24345	1.23272	1.22182	1.21077	1.19959	1.18829	1.17688	1.16536	1.15373	1.14197	1.13012			-0.45
	-0.50	1.32027	1.31302	1.30556	1.29793	1.29013	1.28217	1.27401	1.26569	1.25721	1.24861	1.23989	1.23104	1.22206	1.21297	1.20377	1.19446	1.18502	1.17547	1.16583	1.15607	1.14621			-0.50	1.28131	1.27353	1.26556	1.25735	1.24893	1.24033	1.23159	1.22268	1.21362	1.20442	1.19508	1.18559	1.17596	1.16621	1.15632	1.14631	1.13618	1.12595	1.11563	1.10521	1.09471			-0.50
Alkaline: Industry Target																								PEM: Industry Target																								SOC: Industry Target
		Change in Electricity Price Variance																								Change in Electricity Price Variance
		-0.50	-0.45	-0.40	-0.35	-0.30	-0.25	-0.20	-0.15	-0.10	-0.05	0.00	0.05	0.10	0.15	0.20	0.25	0.30	0.35	0.40	0.45	0.50				-0.50	-0.45	-0.40	-0.35	-0.30	-0.25	-0.20	-0.15	-0.10	-0.05	0.00	0.05	0.10	0.15	0.20	0.25	0.30	0.35	0.40	0.45	0.50
Change in Electricity Price Average	0.50	2.39376	2.36275	2.33101	2.29859	2.26554	2.23195	2.19781	2.16322	2.1282	2.09277	2.0569	2.02063	1.98406	1.94716	1.91	1.87257	1.8349	1.79696	1.75873	1.72024	1.68158		Change in Electricity Price Average	0.50	2.36441	2.33162	2.2981	2.26393	2.22916	2.19386	2.15807	2.12174	2.08501	2.04788	2.01043	1.97265	1.93458	1.89615	1.85739	1.81838	1.77908	1.73947	1.6996	1.65949	1.6192		Change in Electricity Price Average	0.50
	0.45	2.33812	2.30841	2.27798	2.24692	2.21523	2.18301	2.15029	2.11706	2.08346	2.04945	2.01506	1.98025	1.94511	1.90967	1.87395	1.83798	1.80176	1.76532	1.72862	1.69166	1.65447			0.45	2.30888	2.27746	2.24531	2.21254	2.17916	2.1453	2.11095	2.07611	2.04081	2.00516	1.96915	1.93285	1.89625	1.85936	1.82215	1.78463	1.74688	1.70885	1.67055	1.632	1.59326			0.45
	0.40	2.2824	2.25397	2.22485	2.19512	2.1648	2.13394	2.1026	2.07079	2.03857	2.00597	1.97302	1.9397	1.90599	1.872	1.83773	1.8032	1.76845	1.73346	1.69826	1.66283	1.62717			0.40	2.25326	2.22319	2.19242	2.16103	2.12907	2.0966	2.06368	2.03032	1.99649	1.96228	1.92774	1.89289	1.85777	1.82237	1.78669	1.75071	1.71446	1.67799	1.64126	1.60428	1.56711			0.40
	0.35	2.22658	2.19942	2.17161	2.1432	2.11424	2.08474	2.05476	2.02437	1.99352	1.96234	1.93079	1.89893	1.8667	1.83414	1.80132	1.76824	1.73492	1.7014	1.66766	1.63373	1.5996			0.35	2.19754	2.16881	2.13941	2.10939	2.07885	2.04777	2.01627	1.98434	1.95201	1.91925	1.88618	1.85277	1.81911	1.78518	1.75101	1.71657	1.68185	1.64688	1.61171	1.57631	1.54069			0.35
	0.30	2.17068	2.14476	2.11826	2.09115	2.06352	2.03539	2.00677	1.97776	1.94833	1.91851	1.88839	1.85794	1.82719	1.7961	1.76471	1.73308	1.70121	1.66912	1.63685	1.60437	1.57173			0.30	2.14173	2.11432	2.08628	2.05764	2.02848	1.99882	1.96871	1.93821	1.90734	1.87607	1.84443	1.8125	1.78028	1.74783	1.71512	1.68219	1.64901	1.61557	1.5819	1.54806	1.51402			0.30
	0.25	2.11466	2.09	2.06476	2.03897	2.01266	1.98588	1.95864	1.93097	1.90295	1.87454	1.84579	1.81676	1.78743	1.75782	1.72789	1.69769	1.66728	1.63664	1.6058	1.57479	1.5436			0.25	2.0858	2.05972	2.03302	2.00575	1.97796	1.94971	1.921	1.89192	1.86247	1.83269	1.80252	1.77203	1.74128	1.71027	1.67904	1.64758	1.61592	1.58402	1.55188	1.51953	1.48704			0.25
	0.20	2.05853	2.03513	2.01114	1.98665	1.96165	1.93621	1.91032	1.88403	1.85736	1.83036	1.80301	1.77537	1.74745	1.71927	1.69083	1.66209	1.63311	1.60392	1.57453	1.54495	1.51523			0.20	2.02977	2.005	1.97963	1.95373	1.92731	1.90044	1.87315	1.84545	1.81743	1.78908	1.7604	1.73138	1.70208	1.67253	1.64275	1.61276	1.58256	1.55218	1.52158	1.49076	1.45976			0.20
	0.15	2.00228	1.98014	1.9574	1.93418	1.91049	1.88636	1.86183	1.8369	1.81159	1.78597	1.76003	1.73377	1.70725	1.68048	1.65347	1.62622	1.5987	1.57094	1.543	1.51487	1.48658			0.15	1.97364	1.95015	1.9261	1.90155	1.8765	1.851	1.82511	1.79883	1.7722	1.74527	1.71804	1.69052	1.66267	1.63457	1.60625	1.57771	1.54899	1.52007	1.49098	1.4617	1.43224			0.15
	0.10	1.9459	1.92501	1.90353	1.88156	1.85917	1.83634	1.81314	1.78956	1.76563	1.74135	1.7168	1.69196	1.66682	1.64145	1.61585	1.59002	1.56399	1.5377	1.51119	1.48451	1.45767			0.10	1.91739	1.89518	1.87244	1.84921	1.82553	1.8014	1.77688	1.75202	1.72679	1.70127	1.67546	1.64939	1.62304	1.59639	1.56952	1.54245	1.51517	1.48772	1.4601	1.43232	1.40438			0.10
	0.05	1.8894	1.86973	1.84951	1.8288	1.80766	1.78616	1.76425	1.74201	1.71943	1.69654	1.67333	1.64988	1.62616	1.60217	1.57797	1.55356	1.52894	1.50413	1.4791	1.45385	1.42844			0.05	1.86103	1.84007	1.81863	1.79672	1.77437	1.75162	1.72847	1.70498	1.68118	1.65705	1.63266	1.608	1.58311	1.55796	1.53254	1.50692	1.48111	1.45511	1.42894	1.40263	1.37618			0.05
	0.00	1.83276	1.8143	1.79533	1.77587	1.75599	1.73576	1.71517	1.69424	1.67301	1.65147	1.62964	1.60753	1.5852	1.56263	1.53981	1.51679	1.49359	1.47019	1.44662	1.42286	1.39891			0.00	1.80452	1.78484	1.76466	1.74406	1.72303	1.70163	1.67986	1.65774	1.63532	1.61262	1.58961	1.56638	1.54291	1.51921	1.49529	1.47113	1.44676	1.42223	1.39751	1.37266	1.34768			0.00
	-0.05	1.77598	1.75872	1.74097	1.72277	1.70415	1.68516	1.66587	1.64625	1.62633	1.60613	1.58567	1.56493	1.54395	1.52276	1.50136	1.47973	1.45791	1.43593	1.41377	1.39145	1.36898			-0.05	1.74787	1.72946	1.71054	1.69122	1.67152	1.65144	1.63103	1.61029	1.58924	1.56792	1.54634	1.52449	1.50244	1.48016	1.45769	1.43502	1.41212	1.38903	1.36578	1.34238	1.31884			-0.05
	-0.10	1.71907	1.70297	1.68644	1.66947	1.65211	1.63438	1.61634	1.59802	1.57941	1.56053	1.5414	1.52203	1.50242	1.48259	1.46256	1.44234	1.42193	1.40132	1.38057	1.35966	1.3386			-0.10	1.69107	1.67391	1.65626	1.6382	1.6198	1.60104	1.58196	1.56259	1.54291	1.52296	1.50277	1.48235	1.46168	1.44082	1.41977	1.39853	1.37712	1.35551	1.33371	1.31176	1.28969			-0.10
	-0.15	1.66202	1.64706	1.63171	1.61596	1.59985	1.58338	1.56659	1.54953	1.53222	1.51465	1.49684	1.47881	1.46056	1.44209	1.42342	1.40457	1.38555	1.36636	1.34699	1.32746	1.30782			-0.15	1.63412	1.61817	1.6018	1.58501	1.56786	1.55042	1.53266	1.51461	1.49631	1.47773	1.45891	1.43987	1.42063	1.40117	1.38151	1.3617	1.34171	1.32157	1.30126	1.28078	1.26014			-0.15
	-0.20	1.60483	1.59099	1.57678	1.56224	1.54734	1.53213	1.5166	1.50079	1.48474	1.46847	1.45197	1.43525	1.41833	1.40123	1.38392	1.36644	1.34877	1.33096	1.313	1.29489	1.27661			-0.20	1.57699	1.56227	1.54713	1.53161	1.51573	1.49955	1.48311	1.46638	1.4494	1.4322	1.41475	1.39708	1.37921	1.36117	1.34293	1.3245	1.30593	1.28721	1.26834	1.24934	1.23019			-0.20
	-0.25	1.54748	1.53474	1.52167	1.50828	1.4946	1.4806	1.46633	1.45178	1.43698	1.42196	1.40675	1.39135	1.37574	1.35996	1.344	1.32788	1.31159	1.29513	1.27853	1.2618	1.24495			-0.25	1.5197	1.50616	1.49224	1.47797	1.46336	1.44845	1.43327	1.41786	1.40221	1.38633	1.37024	1.35395	1.33746	1.32078	1.30394	1.28693	1.26976	1.25243	1.23499	1.21741	1.1997			-0.25
	-0.30	1.48999	1.47832	1.46635	1.4541	1.44158	1.4288	1.41574	1.40245	1.38891	1.37515	1.36119	1.34706	1.33277	1.31829	1.30365	1.28886	1.27392	1.25883	1.2436	1.22823	1.21273			-0.30	1.46224	1.44984	1.43713	1.42408	1.41073	1.39708	1.38317	1.36903	1.35468	1.34013	1.32537	1.31043	1.2953	1.28	1.26453	1.2489	1.23314	1.21724	1.20118	1.185	1.16872			-0.30
	-0.35	1.43232	1.42172	1.41082	1.39969	1.3883	1.37668	1.36484	1.35276	1.34047	1.32797	1.31527	1.30239	1.28935	1.27617	1.26285	1.24937	1.23574	1.22199	1.20812	1.19412	1.17999			-0.35	1.40461	1.39334	1.38177	1.36993	1.3578	1.34541	1.33277	1.31989	1.30681	1.29355	1.28012	1.26649	1.25271	1.23877	1.22467	1.21042	1.19603	1.1815	1.16686	1.1521	1.13721			-0.35
	-0.40	1.37443	1.36491	1.35509	1.34502	1.33475	1.32427	1.31358	1.30271	1.29163	1.28037	1.26893	1.25731	1.24553	1.2336	1.22154	1.20935	1.19705	1.18461	1.17205	1.15938	1.1466			-0.40	1.34679	1.33661	1.32618	1.31549	1.30457	1.29341	1.28202	1.27041	1.25859	1.2466	1.23444	1.22213	1.20967	1.19705	1.18429	1.17141	1.15839	1.14524	1.13197	1.11859	1.10511			-0.40
	-0.45	1.31634	1.30785	1.29911	1.29012	1.28092	1.27154	1.26199	1.25226	1.24237	1.23232	1.2221	1.21172	1.2012	1.19053	1.17973	1.1688	1.15775	1.14661	1.13537	1.12401	1.11254			-0.45	1.28878	1.27968	1.27034	1.26078	1.25101	1.24104	1.23088	1.22051	1.20996	1.19923	1.18834	1.17729	1.16612	1.15482	1.14339	1.13183	1.12015	1.10837	1.09647	1.08446	1.07235			-0.45
	-0.50	1.25805	1.25054	1.24283	1.23491	1.22679	1.21848	1.21002	1.20142	1.19267	1.18377	1.17475	1.1656	1.1563	1.14687	1.13733	1.12766	1.11787	1.10798	1.09799	1.08792	1.07775			-0.50	1.23052	1.2225	1.21424	1.20577	1.19713	1.18831	1.17932	1.17017	1.16085	1.15137	1.14175	1.13197	1.12206	1.11202	1.10188	1.09164	1.08129	1.07082	1.06026	1.0496	1.03886			-0.50
Alkaline: IEA Target																								PEM: IEA Target																								SOC: IEA Target
		Change in Electricity Price Variance																								Change in Electricity Price Variance
		-0.50	-0.45	-0.40	-0.35	-0.30	-0.25	-0.20	-0.15	-0.10	-0.05	0.00	0.05	0.10	0.15	0.20	0.25	0.30	0.35	0.40	0.45	0.50				-0.50	-0.45	-0.40	-0.35	-0.30	-0.25	-0.20	-0.15	-0.10	-0.05	0.00	0.05	0.10	0.15	0.20	0.25	0.30	0.35	0.40	0.45	0.50
Change in Electricity Price Average	0.50	2.25711	2.22466	2.1915	2.15776	2.12347	2.08861	2.05328	2.01753	1.98143	1.94498	1.90819	1.87102	1.83355	1.79578	1.75768	1.7193	1.68063	1.64173	1.60257	1.56318	1.52363		Change in Electricity Price Average	0.50	2.2431	2.20927	2.1748	2.13966	2.10398	2.06783	2.03127	1.99433	1.95695	1.91919	1.88108	1.8426	1.80379	1.76468	1.72527	1.68558	1.64564	1.60544	1.56497	1.5243	1.48349		Change in Electricity Price Average	0.50
	0.45	2.20393	2.1728	2.14101	2.10862	2.0757	2.04228	2.00833	1.974	1.93929	1.90426	1.86892	1.83324	1.79722	1.76093	1.72435	1.68747	1.65032	1.61292	1.57529	1.53743	1.4994			0.45	2.18992	2.15745	2.12436	2.09066	2.05639	2.02165	1.98652	1.95102	1.91513	1.87884	1.84223	1.80527	1.76799	1.73039	1.69252	1.65438	1.61597	1.57734	1.53845	1.49933	1.46007			0.45
	0.40	2.15065	2.12085	2.09041	2.05936	2.02782	1.9958	1.96328	1.93034	1.89703	1.86341	1.82949	1.79528	1.76074	1.72589	1.69081	1.65544	1.6198	1.58391	1.54779	1.51146	1.47496			0.40	2.13665	2.10554	2.07382	2.04155	2.00869	1.97538	1.94165	1.90757	1.87315	1.83836	1.80321	1.76777	1.732	1.69593	1.65958	1.62298	1.58611	1.54901	1.5117	1.47416	1.43645			0.40
	0.35	2.09728	2.0688	2.03969	2.01001	1.97982	1.94917	1.91809	1.88654	1.85465	1.82242	1.78991	1.75713	1.72407	1.6907	1.65706	1.6232	1.58907	1.55469	1.52007	1.48525	1.45028			0.35	2.08328	2.05355	2.02319	1.9923	1.96089	1.92898	1.89666	1.86401	1.83102	1.79771	1.76404	1.73008	1.69584	1.66128	1.62645	1.59137	1.55605	1.52049	1.48471	1.44875	1.41262			0.35
	0.30	2.04381	2.01665	1.98886	1.96054	1.93169	1.90242	1.87273	1.84262	1.81211	1.78129	1.75018	1.71881	1.68719	1.65531	1.62314	1.59072	1.5581	1.52523	1.49213	1.45882	1.42534			0.30	2.02982	2.00144	1.97244	1.94294	1.91295	1.88245	1.85157	1.82031	1.78874	1.75688	1.72471	1.69222	1.65946	1.62644	1.59312	1.55956	1.52576	1.49175	1.45751	1.42308	1.38852			0.30
	0.25	1.99024	1.96439	1.93792	1.91093	1.88345	1.85552	1.82721	1.79852	1.76943	1.74001	1.7103	1.68033	1.65013	1.61968	1.589	1.55806	1.52688	1.49552	1.46393	1.43213	1.40016			0.25	1.97627	1.94922	1.9216	1.89345	1.86485	1.83581	1.80631	1.77648	1.74632	1.71589	1.68519	1.65419	1.62289	1.59137	1.55958	1.52754	1.49526	1.46277	1.43007	1.39719	1.36414			0.25
	0.20	1.93657	1.912	1.88686	1.86119	1.83506	1.80848	1.78154	1.75423	1.72658	1.69855	1.67026	1.64168	1.61288	1.58386	1.55463	1.52517	1.49546	1.46555	1.43546	1.40517	1.37471			0.20	1.92261	1.89689	1.87063	1.84384	1.81662	1.78899	1.76093	1.7325	1.70376	1.67475	1.64547	1.61595	1.58615	1.55607	1.5258	1.49528	1.46452	1.43355	1.40238	1.37103	1.33953			0.20
	0.15	1.8828	1.8595	1.83567	1.81132	1.78652	1.76131	1.7357	1.70977	1.68351	1.65693	1.63002	1.60286	1.57545	1.54784	1.52002	1.49201	1.46379	1.43535	1.40671	1.37791	1.34896			0.15	1.86884	1.84446	1.81953	1.79411	1.76825	1.742	1.71539	1.68837	1.66105	1.63344	1.60559	1.57749	1.54918	1.5206	1.49177	1.46276	1.43353	1.40408	1.37443	1.34459	1.31463			0.15
	0.10	1.8289	1.80687	1.78433	1.7613	1.73782	1.71396	1.68971	1.66513	1.64025	1.61508	1.5896	1.56383	1.53784	1.51162	1.48521	1.45861	1.43184	1.40488	1.37772	1.35036	1.32289			0.10	1.81495	1.79189	1.76829	1.74424	1.71973	1.69487	1.66964	1.64408	1.61815	1.59197	1.56552	1.53885	1.51197	1.48488	1.45755	1.42999	1.40226	1.37433	1.3462	1.31789	1.28943			0.10
	0.05	1.77489	1.75413	1.73285	1.71113	1.68898	1.66643	1.64355	1.62031	1.5968	1.573	1.54894	1.52459	1.49999	1.47519	1.45017	1.42498	1.39963	1.3741	1.34842	1.32255	1.29652			0.05	1.76094	1.73919	1.71693	1.6942	1.67108	1.64756	1.62372	1.59957	1.57508	1.5503	1.52527	1.50001	1.47455	1.44889	1.42305	1.39698	1.37071	1.34427	1.31767	1.29088	1.26394			0.05
	0.00	1.72077	1.70123	1.68123	1.66079	1.63996	1.61874	1.59718	1.57532	1.55313	1.5307	1.50802	1.4851	1.46192	1.43851	1.41491	1.39111	1.36716	1.34305	1.31879	1.29439	1.26984			0.00	1.70682	1.68634	1.66541	1.64402	1.62224	1.60009	1.57761	1.55484	1.53179	1.50844	1.48481	1.46097	1.43692	1.41269	1.38827	1.36368	1.33891	1.31394	1.2888	1.26353	1.23811			0.00
	-0.05	1.66652	1.64819	1.62945	1.61028	1.59074	1.57085	1.55061	1.53008	1.50927	1.48818	1.46687	1.44532	1.42357	1.40158	1.37937	1.35699	1.33443	1.31172	1.28888	1.26589	1.24279			-0.05	1.65255	1.63336	1.61373	1.59367	1.57322	1.55244	1.53132	1.50992	1.48825	1.46633	1.44413	1.4217	1.39907	1.37624	1.35325	1.33009	1.30678	1.2833	1.25965	1.23583	1.21191			-0.05
	-0.10	1.61213	1.59502	1.5775	1.5596	1.54134	1.52275	1.50384	1.48463	1.46516	1.44544	1.42546	1.40528	1.3849	1.36433	1.34355	1.32256	1.30141	1.28012	1.25866	1.23708	1.2154			-0.10	1.59815	1.58023	1.56187	1.54314	1.52402	1.50457	1.48483	1.46478	1.44448	1.42395	1.40319	1.38218	1.36095	1.33955	1.31796	1.29622	1.27434	1.25231	1.23015	1.20782	1.18536			-0.10
	-0.15	1.55758	1.54169	1.52538	1.50873	1.49174	1.47442	1.45683	1.43894	1.42079	1.40241	1.3838	1.36496	1.34595	1.32675	1.30737	1.28782	1.26808	1.24817	1.22813	1.20795	1.18766			-0.15	1.54362	1.52693	1.50986	1.49241	1.47462	1.4565	1.43809	1.41942	1.40048	1.38132	1.36194	1.34236	1.32257	1.30257	1.2824	1.26207	1.2416	1.221	1.20026	1.17941	1.15844			-0.15
	-0.20	1.50287	1.48819	1.4731	1.45766	1.44191	1.42588	1.40956	1.39299	1.37616	1.3591	1.34183	1.32436	1.30669	1.28884	1.27084	1.25267	1.23436	1.21588	1.19723	1.17845	1.15957			-0.20	1.48893	1.47347	1.45765	1.44148	1.42499	1.4082	1.39113	1.37379	1.35622	1.33842	1.32041	1.30222	1.28384	1.26528	1.24653	1.22761	1.20856	1.18936	1.17004	1.15062	1.13108			-0.20
	-0.25	1.44798	1.43448	1.42062	1.40639	1.39187	1.37708	1.36204	1.34675	1.33124	1.3155	1.29955	1.28341	1.2671	1.25061	1.23394	1.21715	1.20021	1.18312	1.16592	1.14856	1.13106			-0.25	1.43407	1.41984	1.40525	1.39035	1.37514	1.35965	1.3439	1.3279	1.31167	1.29524	1.27859	1.26175	1.24476	1.2276	1.21029	1.1928	1.17515	1.15737	1.13947	1.12145	1.10333			-0.25
	-0.30	1.39292	1.38059	1.3679	1.3549	1.3416	1.32803	1.31424	1.30022	1.28599	1.27156	1.25693	1.24212	1.22713	1.21198	1.19669	1.18124	1.16564	1.14994	1.1341	1.11814	1.10209			-0.30	1.37902	1.36602	1.35265	1.33898	1.32504	1.31084	1.29639	1.28172	1.26682	1.25172	1.23644	1.22098	1.20533	1.18955	1.17361	1.15754	1.14134	1.12498	1.10848	1.09188	1.07518			-0.30
	-0.35	1.33768	1.32646	1.31496	1.30315	1.29106	1.27872	1.26614	1.25338	1.24042	1.22726	1.21393	1.20043	1.18677	1.17295	1.15898	1.14488	1.13066	1.11629	1.1018	1.08723	1.07254			-0.35	1.32378	1.31197	1.29983	1.28738	1.27467	1.26174	1.24858	1.2352	1.22163	1.20787	1.19391	1.1798	1.16553	1.15111	1.13653	1.12184	1.10703	1.09209	1.07704	1.06185	1.04655			-0.35
	-0.40	1.28225	1.27214	1.26175	1.25112	1.24023	1.2291	1.21775	1.2062	1.19447	1.18259	1.17053	1.15831	1.14596	1.13346	1.12081	1.10804	1.09514	1.08214	1.06902	1.05578	1.04244			-0.40	1.26832	1.25769	1.24674	1.23553	1.22405	1.21234	1.20045	1.18835	1.17607	1.16362	1.151	1.13822	1.12528	1.11222	1.09902	1.08569	1.07223	1.05868	1.04501	1.03125	1.01739			-0.40
	-0.45	1.22663	1.21758	1.2083	1.19879	1.18907	1.17914	1.169	1.15867	1.14816	1.13749	1.12669	1.11575	1.10466	1.09345	1.08212	1.07067	1.05909	1.04741	1.03561	1.02373	1.01176			-0.45	1.21266	1.20315	1.19339	1.18336	1.17312	1.16264	1.15197	1.14113	1.13013	1.11896	1.10764	1.09618	1.08458	1.07285	1.06098	1.04901	1.03693	1.02473	1.01243	1.00004	0.987564			-0.45
	-0.50	1.17081	1.1628	1.15458	1.14617	1.13757	1.1288	1.11984	1.11072	1.10143	1.09198	1.0824	1.07268	1.06285	1.05292	1.04285	1.03268	1.02242	1.01205	1.00158	0.99102	0.980366			-0.50	1.15678	1.14836	1.13972	1.13088	1.12182	1.11257	1.10313	1.09351	1.08374	1.07384	1.06381	1.05363	1.04334	1.03293	1.0224	1.01176	1.00101	0.990165	0.979234	0.968209	0.957091			-0.50
[truncated: 21 more columns]
